# Supplementary material for: Importance of Biogenic Volatile Organic Compounds to Peroxyacyl Nitrates (PANs) Production in the Southeastern U.S. during SOAS 2013
Source: Copernicus journal article supplement (doi:10.5194/acp-2018-418), 2018-07-10
Supplement: Supplementary file [file acp-2018-418-AC1-supplement.pdf]

Interactive comment on “Importance of Biogenic Volatile Organic Compounds to Peroxyacyl Nitrates (PANs) Production in the Southeastern U.S. during SOAS 2013” by S. Toma et al.

*We are so grateful to both reviewers for their time and insightful comments. Both reviewers were very thorough in their reading of the submitted manuscript. They made thoughtful comments and some excellent suggestions to improve the document and pushed us to think about aspects in different ways. The paper is significantly better as a result of their very careful review. Most of their suggestions have been incorporated in a revised manuscript as described below. Additions, revisions, and other changes made in the document are highlighted in the Word file for easy reference.*

### **Suggestions from and responses to Anonymous Referee #1**

Results shown on figure 3 (PAN behavior with NO<sub>x</sub>) are intriguing. But how would you discount the possibility that the plateauing/leveling-off of PAN with NO<sub>x</sub> above 3.5 ppb is not due to lack of VOC or that measurements were made so close to NO<sub>x</sub> emission sources (since the NO<sub>x</sub> levels are so high) that the VOCs did not have time to react to form PAN? Possible to utilize your 0-D model accounting for as much of observations (VOCs, NO, NO<sub>2</sub>, etc.) to determine the chemical scenarios under which this PAN vs NO<sub>x</sub> behavior can be reproduced? By presenting PAN versus NO<sub>x</sub> for all the campaigns (figure 3), authors are implying that NO<sub>x</sub> level is all you need to know to get PAN levels. This needs to be justified.

*The reviewer is right; there are many possible inputs such as loss rates or photochemical aging or HO<sub>x</sub> production rates that could be responsible (likely a combination) for the behavior. In all these examples NO<sub>x</sub> chemistry and lifetime are key. The Figure is not intended to be seen as a mechanistic explanation but more an observation of a trend seen in a range of sites in the region. We have tried to revise the section of the text to tone down the impression that NO<sub>x</sub> level can be predictive of PAN levels on its own.*

Results shown on figure 4 is fascinating. I think a more thorough discussion of this PAN source attribution comparison between Dickson and SOAS is merited. (Side note, making this into 2 pie charts using the same red and blue color scheme for SOAS and Dickson as in figure 3 would be nice, not critical though). For instance, WHY is anthropogenic a much bigger contributor to PAN during Dickson than SOAS? Can you look into biogenic and anthropogenic VOC emissions inventories for the two regions during the appropriate time periods to determine how they have changed? The NO<sub>x</sub> level during Dickson (figure 3) would suggest it is well below the 3.5 ppb threshold. As such, Dickson is still clearly in the "NO<sub>x</sub> limited" regime. So why would PAN attribution (anthro vs biogenic) be so different between SOAS and Dickson? There are obviously many variables that affect PAN ambient levels (boundary layer height, transport time from main regional NO<sub>x</sub> source, etc.). But at minimum presenting the approximate VOC (anthro and biogenic) precursor levels that affect PAN production and temperature that affect PAN lifetimes for the two campaigns would be helpful.

*NO<sub>x</sub> levels continue to decrease in the country (Blanchard et al., 2012; Russell et al., 2012; USEPA). Emission inventories for anthropogenic VOC emissions have steadily decreased in the southeast over the last 15 years (USEPA) This is consistent with anthropogenic VOC measurements made at various SEARCH sites (including Centreville) in the SE over the same time period. In contrast, the more limited BVOC measurements made at SEARCH sites show consistent BVOC levels over the same time (Hagerman et al., 1997; Hidy et al., 2014). Table 1 now shows that mean levels of O<sub>3</sub> and NO<sub>x</sub> were substantially higher at Dickson than at Centreville, while isoprene levels are a factor of 2 higher at Centreville during the daytime. We have added a diurnal plot of isoprene concentrations from both sites in Figure S4b.*

I would like to see (in the SI or main) the diurnal plot of the PAN/NO<sub>y</sub> ratio (like figure 2 of Roberts 2002) for the Dickson and SOAS campaigns. That ratio can tell you amongst other things how efficiently PANs are being produced. How have the ratios changed over time? Why?

*We plotted the hourly mean diurnal profiles of PANs/NO<sub>y</sub> from the Dickson 1999 and SOAS 2013 campaigns in Figure S4a. This figure shows similar behavior at both sites with similar mean values (0.136 for Dickson and 0.155 for SOAS 2013, see Table 1 in the manuscript) that peak during the daytime. Roberts et al. (2002) reported similar diurnal profiles for the Cornelia Fort Airpark in 1999.*

I would like to see (in the SI) the MPAN vs PAN and PPN vs PAN scatter plots. Are the slopes comparable to observations from other studies? Can these slopes be used as characteristic signatures of anthropogenic and biogenic influences?

Roberts used a range of MPAN vs PAN depending on time of day. Did the authors have to do that as well or were the slopes constant throughout SOAS?

*We added the MPAN vs PAN and PPN vs PAN scatter plots in Figure S5 of the Supplementary Information. While slopes from a single linear regression (SLR) may be similar to the mean ratio, in the multiple linear regression (MLR), the t-value, which is obtained by partial slope/standard error, or  $\beta$ -value (standardized partial regression coefficient) is used to compare the influence of each independent variable instead of slopes, because slope calculations are different in MLR and SLR. In this study we used the determination of coefficients to determine anthropogenic and biogenic sources based on the  $\beta$ -value and correlation coefficient. In general, MLR is more accurate than SLR to predict dependent variable: the coefficient of determination, R<sup>2</sup> in MLR is higher than in SLR.*

*We limited the analysis in this manuscript to daytime data only, and similar to Roberts et al, 2002, we did find different slopes of the regression of MPAN on PAN on different days. The overall slopes of MPAN/PAN are in the same range as previous results, although SOAS has a greater slope overall than Dickson. The observed levels of PPN and MPAN were lower than seen in sites in the 1990s in the southeast such as, Nashville, Dickson, and Youth In., and limited number of data above detection limit made it challenging to compare the behavior at specific times. Since we used measurements from the entire campaign, the data has wider variance. The statistics should be able to assess each partial slope based on calculated probability (p-value). The p-values in Table S2 support the calculated values as signatures of anthropogenic and*

*biogenic influences. Hence, we think the results from MLR statistic are appropriate to discuss in this study.*

I would like to see (possibly appended to figure 1) a diurnal plot of the MLR calculated PAN next to the observed PAN. The MLR model explains 60% of the variance. On average, when is the agreement good and bad. I am skeptical how robust the anthro vs biogenic attribution is for SOAS given how PAN, PPN and MPAN appear all well correlated in time (figure 1).

*We added the plot for measured PAN versus predicted PAN using MLR in Figure S6. The diurnal plot of predicted and measured PAN was added in Figure S7. On average, predicted PAN correlated well with measured PAN, especially in the afternoon. However, the standard deviation of both measured and predicted data are similar (that is why p-value from ANOVA test in Table S1 showed less than significant level). This gives us confidence that the coefficient values for PPN and MPAN in MLR are representative (or robust) values for overall campaign.*

Section on attribution of BHC derived PAN to isoprene. For the ODR approach, your only input was from chamber oxidation of isoprene. Were you able to test MPAN production rates from MBO oxidation? Monoterpenes oxidation? I am concerned that your answer came out to be isoprene only because your input to the ODR was isoprene.

*As the reviewer points out, the ODR approach in this study is limited, since we used isoprene as a proxy for biogenics. This is not completely unreasonable. Isoprene accounted for the majority of OH reactivity at SOAS (Kaiser et al., 2016), MBO has not been shown to produce MACR, at least from OH and O<sub>3</sub> chemistry (e.g. Alvarado et al., 1999; Spaulding et al., 2003) and some monoterpenes can form PAN as a secondary product, but not MACR. The ODR method compared a smog-chamber derived ratio of MPAN/PAN from isoprene to a modeled ratio and used that ratio to get an approximation of isoprene attribution, which is a lower limit of total BVOC attribution.*

I question the relevance/validity of discussion section 4.1. Authors used MPAN vs PAN to establish that 50-70% of SOAS PAN is biogenic. You determined that biogenic PAN is mostly from isoprene. So why is it surprising that MPAN and isoprene hydroxy nitrates are well correlated?

*We expected that primary products from isoprene oxidation (MACR and IN) would be more tightly correlated than a primary and a secondary (MPAN and IN). So maybe "surprising" is too strong of a word, but it is noteworthy that. Also we added a figure of the ratio of IN/MPAN as a function of NO<sub>x</sub> that shows that the variability of the relationship is different under different NO<sub>x</sub> conditions. In the range of NO<sub>x</sub> that Thornton et al. (2002) found for high P(HO<sub>x</sub>) the ratio spans a large range. At higher NO<sub>x</sub> values the ratio is relatively constant.*

The statement that "...MPAN shows significant contribution to OA growth...", based entirely on correlation, is unconvincing. The contribution to OA from MPAN can be estimated knowing the volatility (or C\*) and its abundance in the gas phase or its SOA yield along with its lifetime. More data (calculations, model runs, etc.), not citations to other papers that merely suggest the possibility, is needed.

*The word “significant” in this phrase simply refers to the statistical test of the correlation and does not mean to imply a specific contribution to aerosol growth. We agree that the data are too limited to draw strong conclusions, but they do support the hypothesis that there is a contribution to aerosol growth without inclusion of nitrogen. We have re-worded this statement to remove the word significant.*

Need citations for sentence on lines 16-18, page 10.

*Three representative citations were added: Paulot et al. (2009), Mao et al. (2013), and Liu et al. (2013).*

## **Suggestions from and responses to Anonymous Referee #2**

General comments:

Section 1: The first paragraph of the introduction should be placed in the experimental section as it is related to the measurements site and context. It would be useful to give typical mixing ratios (or ranges) of PANs expected in urban/rural/forested environments with information on seasonal variations and global trends over the last decades. The different sinks of PANs should be described. The introduction should better underline the importance of understanding PANs chemistry (NO<sub>x</sub> removal/ transport, aerosol aging).

*This first paragraph was moved to Section 2, as suggested. The introduction was enhanced to give a more detailed evaluation of the importance of PAN in the global atmosphere and to outline the loss mechanisms for PAN compounds as suggested by the reviewer.*

Section 2: The experimental section should contain a brief description of the meteorological conditions at the site during the campaign (temperature, humidity ...). Were those conditions expected at this location or were there different from classically encountered conditions? A citation could be placed if other papers describe the campaign in more details. I don't understand the point of discussing in such details the sum of PANs measurements by thermal dissociation as those data are used marginally in the paper. The authors should precise what they mean by NO<sub>y</sub> and NO<sub>z</sub> measurements. This last comment apply to the whole manuscript.

*The meteorological conditions of the ground site have been described in detail in Carlton et al, 2018 and Hidy et al., 2014. We have indicated this in the revised version. The point of discussing the comparison of measurements is for due diligence of somewhat co-located measurements at the site, although there was no formal inter-comparison between the measurements during the campaign. This gives us limits on the confidence we have for the speciated measurements. We agree that having this section in the main paper can be distracting and we have moved it to the supplemental materials. NO<sub>y</sub> is defined as gas-phase oxidized nitrogen now in the experimental section where it is introduced.*

Section 3.1: The time series of PANs (figure 1) should be accompanied by temperature, NO<sub>x</sub> and O<sub>3</sub> as correlations are strongly expected and this would help to see anthropogenic influence. The profiles of PANs could be discussed further. To what is due the morning peak, is it advection? Mixing with residual layer? It would be useful to add a profile for global radiation to figure 2. Since the sum of PANs have been measured, it would be interesting to know what fractions of total PANs represent PAN, PPN and MPAN. This would justify the big paragraph of total PANs measurements comparison in the experimental section.

*We have added timeseries for NO<sub>x</sub>, O<sub>3</sub>, and Temperature to Figure 1. The diurnal morning increase observed for PANs is also observed in ozone, NO<sub>x</sub>, and isoprene is a result of morning breakup of a nocturnal inversion that was commonly observed at the site. It is very similar to variations observed at other ground sites (Nashville, Dickson, BEARPEX, PROPHET). We have also included in Table 1 additional information regarding the relative concentrations of various parameters, as suggested by the reviewer, for the SOAS site as well as for the other historical sites where PANs were measured. This was made more clear in the text.*

Section 3.2: Figure 3 is very interesting and show well that the 2013 measurements might correspond to a shift to a NO<sub>x</sub> limited regime, however, the authors should discuss further the possibility that the observations on the 2013 can be explained by a lower PHO<sub>x</sub> (due to lower photolysis rates or OH precursors) as mentioned very/too briefly and explained in Thornton et al. 2002. The authors should also discuss the possibility that observations correspond to older air masses or higher NO<sub>x</sub>/PANs loss rates compared to the other measurements which would explain the lower PAN and NO<sub>x</sub> data.

*This is a good point. As seen in Figure 1, and explained in Hidy et al., ozone, NO<sub>x</sub>, and photolysis rates were all lower at this ground site than in previous years, which likely results in lower overall oxidation rates due to lower radical production rate (PHO<sub>x</sub>). This paragraph has been revised.*

Section 3.3: The authors should describe briefly the hypothesis that are necessary to apply the MLR (and not only cite references) and the validity limits. Especially, this method imply that all PANs are only lost by thermal decomposition, however, the authors state in Section 4 that the reaction MPAN + OH represent a non-negligible sink of MPAN. Doesn't it invalidate/limit the MLR analysis? LaFranchi et al. 2009, using a steady state method for PAN sources attribution, show that the results (relative parts of BHC and AHC) are strongly dependent on temperature, because this factor affects the emissions of isoprene (Worton et al. 2013). This could maybe explain the differences between the 2013 and 1999 results (if temperature was much higher in 2013). The authors should comment on this. Why not apply all 3 methods to all the historical measurements? This would allow to make the conclusions more robust if for all rural measurements in the 90s, the BHC role as PAN precursors was higher than for urban measurements, and if all rural measurements in the 90s were all more oriented toward AHC than the 2013 results. This would maybe allow to conclude on the decrease of AHC role in PANs production.

*The MLR is a purely observational model that necessarily incorporates all loss processes for PANs active at the time and place of the measurements. Because OH reactions with MPAN is more important than with PAN or PPN the biogenic (MPAN) contribution might be conservative in our analysis. As pointed out, it appears that P(HOx) was low at SOAS 2013, so this factor may be smaller than at other sites. Additional modeling is beyond the intention of this work, and application of other models at Dickson is hampered by the more limited dataset available for Dickson and other sites.*

Section 4: As stated by the authors, the relationship between IN and MPAN should be depending on the NO/NO<sub>2</sub> ratio. This fact could be well visualized by a plot of IN vs MPAN color coded with the NO/NO<sub>2</sub> ratio. The authors cite Worton et al. 2013 but do not mention that in this reference, the authors state that MPAN uptake on aerosols results in the formation in organo-sulfates in the aerosol pahse, which is a likely explanation for the weak dependence of pONs on MPAN.

*As recommended by the reviewer, a graph of the ration IN/MPAN vs NO<sub>x</sub> has been included as Figure 6 in the manuscript. The figure shows two modes. The IN/MPAN ratio varies over a large range when NO<sub>x</sub> < 1ppb, corresponding to the range of high P(HOx) described by Thornthorn et al., (2002). At higher NO<sub>x</sub> levels, the ratio remains fairly constant around 2.5-3. At lower NO<sub>x</sub> levels, NO<sub>x</sub> is more efficiently tied up in IN than in MPAN) and the MPAN+OH loss rate at low NO<sub>x</sub>? We have edited the paragraph to explain this. Reference to the organosulfate mechanism has been added to this section. Thanks.*

Section 3 and 4: Isoprene has a central role in all results and discussions but nothing is said about its mixing ratios which were measured in 2013 and 1999 together with the PANs.

*In the supplemental materials we have added figures illustrating isoprene levels at SOAS and Dickson in Figure S4b. Emissions at both sites were significant, but with lower photolysis rates and the lower levels of radical precursors (mainly O<sub>3</sub>) the lifetime of isoprene was likely greater at SOAS leading to higher average daytime values.*

*Most of the "Specific Comments" made by reviewer #2 listed below were incorporated in the revised manuscript exactly as suggested.*

Specific comments

page 1 line 31 : sensitive could be replace by "controled by NO<sub>x</sub>"

*Replaced.*

page 2 line 1 & 2 : the last sentence is not really necessary

*Deleted.*

page 2 line 9 : also give official IUPAC name

*Added.*

page 2 line 11 : The role and importance of PANs could be placed in a global context instead of being reduced to the Eastern U.S.

*Added several sentences to expand the context.*

page 2 line 13 : phytotoxic

*This sentence was revised to read "they are significant health hazards for both humans and plants."*

page 2 line 14 : how abundant in term of fraction of PANs ?

*Added the approximate range of PAN/NO<sub>y</sub> values that have been observed.*

page 2 line 25 & 26 & 27 : this sentence is confusing, maybe removing the because would help. aerosol radiative forcing could be replaced by secondary organic aerosol formation.

*Revised as suggested.*

page 3 line 6 : "was" should be replaced by "is" ; which type of vegetation does "forested" correspond to ?

*Clarified. A more detailed description of the forest type is given with reference.*

page 3 line 10 : what about BHC sources at the Dickson site

*Information about mean isoprene values for Dickson have been included in Table 1.*

page 3 line 15 : what about air mass origins during the measurements ?

*Air mass origins have been discussed in Hidy et al. (2014) and Carleton et al. (2018).*

page 4 line 3 : what is NO<sub>y</sub>, is it total NO<sub>y</sub> by catalytic conversion ?

*NO<sub>y</sub> was defined explicitly as described in Hidy et al., 2014..*

page 4 line 15 : what does WMU stands for ?

page 4 line 18 : Where are those WMU measurement described ? With which type of instrument ?

*These two comments refer to the comparison between measurements that was moved to the supplemental materials. WMU stands for Western Michigan University, where the primary author did the work.*

page 4 line 27 & 28 : the correlation allows for the investigation of PANs behavior but those values are never used in this paper, why compare the 3 instruments then ?

*As described above, the point of discussing the comparison of measurements is for due diligence of somewhat co-located measurements at the site, although there was no formal inter-comparison between the measurements during the campaign.*

page 5 line 7 : add "(see Sect.3.2)" after "the last 20 years"

*Added.*

page 5 line 9 : what about the 2 others peaks near 1 ppbv

*The other peaks could not be attributed to extremely local biomass burning.*

page 5 line 11 : what is the ratio between PAN and sum of PNs ? page 5 line 14 : define NOy

*Details for all sites can now be seen in Table 1. We also included a line in the text that reads "PAN was consistently the most abundant peroxyacyl nitrate compound, the mean daytime levels accounting for approximately 90% of total PANs."*

page 5 line 20 : replace "surface air" by "air masses" or "sampled air" ; they seems to be a net difference between air masses from the south and air masses from the north. Would the MLR for PAN pre-cursors identification reveal a difference as well between south and north.

*Surface air was replaced. We also included a polar plot of isoprene concentrations in the supplemental materials that shows the biogenic precursors are not as directionally dependent.*

page 5 line 24 & 25 : it would be nice to be able to see NOx and O3 somewhere. And what about differences in terms of VOCs mixing ratios between North and South, some BHC and AHC were measured during SOAS 2013. They could be described somewhere in the paper.

*These have been added to Figure 1..*

page 5 line 29 : to solve that a different scale could be used on figure 2 for the North and the South data

*This sentence was revised to read "The diurnal cycle for PPN was less pronounced because of the low concentrations observed over the campaign".*

page 5 line 31 : maybe an equation would be helpful for the decomposition lifetime calculation.

*An equation has been added to the Introduction section to describe PAN loss dependence on NOx.*



page 6 line 11 : replace "higher PAN concentration with higher NO<sub>x</sub>" with "higher PAN and NO<sub>x</sub> concentrations"

*Replaced.*

page 6 line 12 : what does "revisited" means ?

*The phrase was modified to read "The only site sampled in more than one year was ROSE..."*

page 6 line 13 : "hence, the PAN concentrations can vary depending on place and year" could be replaced by "Overall, the PAN concentrations were strongly variable between sites and years" ; which type of curve fit ?

*The sentence was revised. A log-normal curve fit function is now indicated.*

page 6 line 17 : "and the peak was at around" should be replaced with "with a maximum around"

*Replaced.*

page 6 line 30 : yes covariance has been observed but that is because they are both produced by photo-oxidation of VOCs in the presence of NO<sub>x</sub>, this is the reason why PAN vs NO<sub>x</sub> looks similar to O<sub>3</sub> vs NO<sub>x</sub> : their production pathways are the same. \

page 7 line 2 & 3 : the sentence "and most PAN concentration at rural sites were dependent on NO<sub>x</sub> concentrations" is confusing and does not bring any information. It seems to say that only in rural areas are PAN concentrations correlated with NO<sub>x</sub> concentrations which is not the case.

*We thank the reviewer for pointing out the oversimplification of the last 2 comments. We have revised the text to read "The covariance between PAN and O<sub>3</sub> (Bottenheim et al., 1994) due to their common photochemical pathway in the atmosphere suggests that the steep increase of PAN concentrations with NO<sub>x</sub> at low NO<sub>x</sub> in Figure 3a could result from NO<sub>x</sub>-limited chemistry. Most rural sites showed PAN levels more sensitive to NO<sub>x</sub> concentrations."*

page 7 line 7 : references ?

*References to decreases in NO<sub>x</sub> concentrations and emissions have been added.*

page 7 line 11 : "sources" should be replaced with "precursors"

*Replaced.*

page 7 line 18 : it should be mentioned somewhere that the A factor correspond to background PAN

*A parenthetical phrase was added.*

page 8 line 16 : replace “Also, in Dickson 1999 . . . higher” with : “while NO<sub>x</sub> levels were seven times higher”.

*Replaced.*

page 8 line 19 : “(mostly isoprene)” could be added behind “Biogenic influence” C6

*Added.*

page 9 line 8 : describe the 0D model method in more details. What are the hypothesis?

*The 0D model was based on the Master Chemical Mechanism v3.3. Explicit isoprene chemistry together with the inorganic mechanisms was used included chemical mechanisms for some monoterpenes (a-pinene, b-pinene, and limonene) was used to evaluate ambient field data. PANs were the main focus, so the model was constrained with a subset of parameters (NO<sub>2</sub>, NO, OH, HO<sub>2</sub>, CO, H<sub>2</sub>O, ozone, acetaldehyde, and acetone). In addition to thermal and OH loss processes, the model included PAN loss by deposition.*

page 10 line 25,26,27 : the fact that IN is high during the day does not mean that its production is high during the day, it could be produced by NO<sub>3</sub> oxidation of isoprene and have a long lifetime enough to be observed during the day, which is why talking about daytime in line 26 is not very accurate. Moreover, saying that IN is the dominant sink is as well not accurate. IN is a sink of NO<sub>x</sub> if IN removal leads to a net loss of NO<sub>x</sub>, but what happens if IN releases NO<sub>x</sub> due to oxidation or due to uptake to the aerosol phase and subsequent release of NO<sub>x</sub>. How does the general context of those measurements compare to Romer et al. ?

*We agree this section was overstated, and again thank the reviewer for calling it out. We have toned down the text by removing the last sentence. We discuss the NO<sub>x</sub> dependence in more detail, as described earlier, with a new figure. Romer et al. do find that the production and loss of organic nitrates strongly affect NO<sub>x</sub> at SOAS and that daytime production is significant.*

page 11 line 4 : Worton et al. 2013 suggest that uptake of organics following MPAN + OH reaction occurs through the formation and subsequent uptake of methacrylic acid epoxide (MAE).

*A reference to Worton et al. 2013 was included in this sentence.*

page 12 line 5 : remove "data"

*Removed.*

page 12 line 6 : you showed than PAN production is limited by NO<sub>x</sub> availability,

*The sentence was revised as suggested.*

page 12 line 8 : what is seen is that lower NO<sub>x</sub> emissions seem to result in lower ambient PAN concentrations.

*The sentence was revised as suggested.*

page 12 line 11, 12, 13 : the first part of the sentence just repeats line 6 and 7, the second part of the sentence is confusing, where is MPAN production rate as a function of NO<sub>x</sub> discussed ?

*The sentence was removed to avoid redundancy.*

page 12 line 16 : same remark as for line 25, 26, 27 page 10, it is not clear that IN is a net sink, since the removal pathway that is discussed in this paper, aerosol uptake, does not seem to trap NO<sub>x</sub> in the aerosol phase.

*The last part of this sentence suggesting that IN is a net sink was removed.*

page 12 line 17 : is 66% an average of the three methods ? The sentence "twice as much as anthropogenic influence during the overall campaign" is redundant. If biogenic influence is 66%, then the rest is obviously anthropogenic influence and logically 33% which is ... twice less.

*Redundancy was removed.*

1 **Importance of Biogenic Volatile Organic Compounds to Peroxyacyl**  
2 **Nitrates (PANs) Production in the Southeastern U.S. during SOAS 2013**

3 **Shino Toma<sup>1</sup>, Steve Bertman<sup>1</sup>, Christopher Groff<sup>2</sup>, Fulizi Xiong<sup>2</sup>, Paul B. Shepson<sup>2</sup>, Paul Romer<sup>3</sup>,**  
4 **Kaitlin Duffey<sup>3</sup>, Paul Wooldridge<sup>3</sup>, Ronald Cohen<sup>3</sup>, Karsten Baumann<sup>4</sup>, Eric Edgerton<sup>4</sup>, Abigail R.**  
5 **Koss<sup>5,7\*</sup>, Joost de Gouw<sup>5</sup>, Allen Goldstein<sup>6</sup>, Weiwei Hu<sup>7,8</sup>, and Jose L. Jimenez<sup>7,8</sup>**

- 6 [1]{Department of Chemistry, Western Michigan University, Kalamazoo, MI, USA}  
7 [2]{Departments of Chemistry, and Earth, Atmospheric, and Planetary Sciences, Purdue University, West  
8 Lafayette, IN, USA}  
9 [3]{Department of Chemistry, University of California, Berkeley, CA, USA}  
10 [4]{Atmospheric Research & Analysis, Inc., Cary, NC, USA}  
11 [5]{NOAA ESRL Chemical Sciences Division, Boulder, CO, USA}  
12 [6]{Department of Environmental Science, Policy and Management, University of California, Berkeley,  
13 CA, USA}  
14 [7]{Cooperative Institute for Research in Environmental Sciences, University of Colorado, Boulder,  
15 Colorado, USA}  
16 [8]{Department of Chemistry and Biochemistry, University of Colorado, Boulder, Colorado, USA}  
17 \*now at Department of Civil and Environmental Engineering, Massachusetts Institute of Technology,  
18 Cambridge, MA, USA

19  
20 Correspondence to: S. Bertman ([steven.bertman@wmich.edu](mailto:steven.bertman@wmich.edu))

21  
22 KEY WORDS: isoprene, PAN, MPAN, SOAS, BVOC  
23

24 **Abstract**

25 Gas-phase atmospheric concentrations of PAN, PPN, and MPAN were measured at the ground using GC-  
26 ECD during the SOAS 2013 campaign (1 June to 15 July 2013) in Centerville, Alabama in order to study  
27 biosphere-atmosphere interactions. Average levels of PAN, PPN and MPAN were 169, 5, and 9 pptv  
28 respectively, and the sum accounts for an average of 16% of NO<sub>y</sub> during the daytime (10 am to 4 pm local  
29 time). Higher concentrations were seen on average in air that came to the site from the urban NO<sub>x</sub> sources  
30 to the north. PAN levels were the lowest observed in ground measurements over the past two decades in  
31 the Southeastern U.S. A multiple regression analysis indicates that biogenic VOCs account for 66% of  
32 PAN formation during this study. Comparison of this value with a 0-D model simulation of peroxyacetyl  
33 radical production indicates that at least 50% of PAN formation is due to isoprene oxidation. MPAN has a  
34 statistical correlation with isoprene hydroxynitrates (IN). Organic aerosol mass increases with gas-phase  
35 MPAN and IN concentrations, but the mass of organic nitrates in particles is largely unrelated to MPAN.

## 1. Introduction

Peroxyacyl nitrates (carboxylic nitric anhydrides) (PANs,  $\text{RC(O)OONO}_2$ ), products of the photooxidation of VOCs in the presence of nitrogen oxides ( $\text{NO}_x$ ), play an important role in the chemistry of both gases and particles in the troposphere. Measurements around the world have shown that PANs can comprise 15-40% of total gas-phase oxidized nitrogen in rural and forested areas, including the Eastern United States depending on how aged the air sampled at the site (e.g. Trainer et al., 1993, Nouaime et al., 1998). The fraction depends on air mass history and conditions. Gas-phase nitric acid, the other major component is more easily lost than PAN so  $\text{HNO}_3$  deposition rate is also a factor. PANs are ubiquitous reservoir species for  $\text{NO}_x$  and radicals in the atmosphere that affect the lifetime of  $\text{NO}_x$  and enhance tropospheric  $\text{O}_3$  formation (Carter et al., 1981). In addition, they are significant health hazards for both humans and plants (Finlayson-Pitts and Pitts, 2000; Kleindienst et al., 1990).

The peroxyacyl (PA) radicals that are the immediate precursors of PANs can form directly from aldehydes via hydrogen abstraction or from intermediate fragmentation of larger organic compounds and hence can have both anthropogenic and biogenic origins. Scission of the thermally weak bond to  $\text{NO}_2$  regenerates the PA radical. Permanent loss of PANs occurs when the PA radical is lost. With sufficient  $\text{NO}_x$ , this occurs via reduction of  $\text{NO}$ , and gas-phase PAN thermal lifetime, assuming steady-state for PA, depends on the ratio  $\text{NO}/\text{NO}_2$  as described below.  $\text{NO}$  competes with peroxy radicals for reaction with PA at low  $\text{NO}_x$ .

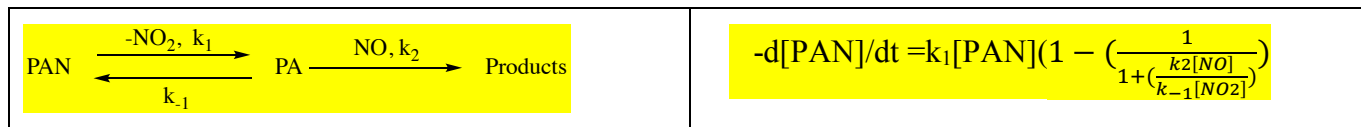

Peroxyacetyl nitrate (PAN) is the simplest and most abundant of the PANs, typically accounting for more than three quarters of the total PANs concentration. Peroxypropionyl nitrate (PPN) and peroxyacryloyl nitrate (MPAN) also are observed in the field (e.g. Nouaime et al., 1998; Pippin et al., 2001; Roberts, 2002). PAN is formed from both anthropogenic and biogenic hydrocarbon precursors. PPN, on the other hand, is formed primarily from anthropogenic hydrocarbons (AHCs) (e.g. propanal, propane, 1-butene) while MPAN is derived from methacrolein (MACR), an oxidation product of the mostly biogenic hydrocarbon (BHC), isoprene (e.g. Biesenthal and Shepson, 1997; Carter and Atkinson, 1996).

Recent laboratory experiments have suggested that OH reaction with the double bond of MPAN could be involved in the formation of secondary organic aerosol (SOA) (Chan et al., 2010; Kjaergaard et al., 2012; Lin et al., 2013; Nguyen et al., 2015; Surratt et al., 2010; Worton et al., 2013). This pathway is currently treated in a few models that include isoprene (e.g. Pye et al., 2013; Pye et al., 2015; Jenkin et al., 2015; Wennberg et al., 2018), although isoprene is the biogenic non-methane hydrocarbon with the greatest global

1 emission rate (Guenther et al., 1995), the contribution of isoprene photooxidation to secondary organic  
2 aerosol formation may be underestimated.

3 We measured PANs concentration during the SOAS 2013 campaign to characterize the systematic  
4 behavior and levels of individual PAN species at an urban-impacted forest and to assess the current state of  
5 the attribution of PANs formation to biogenic and anthropogenic precursors quantitatively using several  
6 statistical methods. Finally, we compared MPAN with another nitrogen compounds in the gas phase, total  
7 isoprene hydroxynitrates (IN) and with organic nitrates or total organic aerosol (OA) in the particle phase  
8 to investigate relationships that might explain their influence on SOA formation.

## 9 2. Experimental

10 Ground-based measurements were conducted from 1 June to 15 July 2013 at the Southeastern Aerosol  
11 Research and Characterization (SEARCH) Centreville (CTR) site, which is located in mixed deciduous–  
12 evergreen forest in the Talladega National Forest near Brent, Alabama, (lat: +32°54'11.81", long: -  
13 87°14'59.79). The major anthropogenic influence at this site comes from the cities of Tuscaloosa and  
14 Birmingham, which are located 50 km northwest and 80 km northeast respectively. The meteorological  
15 conditions of the ground site have been described in detail in Carlton et al (2018) and Hidy et al. (2014).

16 Measurements of PANs using similar methods to those described below were made in Dickson, TN from  
17 15 June to 14 July, 1999 as part of the Southern Oxidants Study (SOS) (Cowling et al., 1998) and are  
18 referred to in the text. The site is in an area of mixed deciduous forest and pastureland located near  
19 Montgomery Bell State Park about 60 km west-southwest (upwind) of downtown Nashville, TN (Chen,  
20 2001). While in a different part of the southeast, we believe that the distance from major urban areas makes  
21 this site a good comparison.

22 PANs were quantified using a custom gas chromatograph (GC) equipped with a Shimadzu GC-Mini-2  
23 <sup>63</sup>Ni electron capture detector (ECD) maintained at 55 °C (described by (Nouaime et al., 1998)). A polar  
24 column (RESTEK, Rtx-200, 15 m x 0.53 mm ID x 1 μm) was kept at 15 C° to minimize thermal  
25 decomposition of PAN compounds. Helium was used as carrier (8 cm<sup>3</sup> min<sup>-1</sup>) with N<sub>2</sub> make-up gas (3 cm<sup>3</sup>  
26 min<sup>-1</sup>). Ambient air was drawn through a ¼" OD PFA Teflon tube from 8.2 m height above the ground at 1  
27 SLPM and a sub-sample of this air was drawn through a 1 cm<sup>3</sup> sample loop at 50 sccm. The residence time  
28 was approximately 9 sec. The sample loop contents were injected into the column at 20 min intervals via a  
29 6-port Teflon valve (Hamilton). The baseline and sensitivity of the GC-ECD were checked every day during  
30 the campaign using standard addition of gas streams from liquid standards added to ambient air scrubbed

1 through a charcoal trap at the beginning of the sampling line. In this way, the impact of the inlet line was  
2 accounted for in the calibration. Separate calibrations were performed with synthetic PAN, PPN, and  
3 MPAN samples in dodecane or tridecane maintained at ice water temperature in diffusion cells. The level  
4 of PAN in each synthetic compound was determined with a chemiluminescence NO<sub>x</sub> analyzer (Thermo  
5 Environmental Instruments, Inc., Model 42S) equipped with a Mo converter held at 325°C. The converter  
6 efficiency was tested by O<sub>3</sub> titration of NO to NO<sub>2</sub>. Calibration of the NO<sub>x</sub> analyzer was done against a  
7 NIST-traceable cylinder of 2ppmv NO in N<sub>2</sub> (SCOTT-MARRIN, INC). Based on sensitivity and  
8 background measurements, the detection limits (S/N=2) for PAN, PPN and MPAN were estimated as 2.5  
9 pptv, 3.6 pptv and 3.9 pptv, respectively. Uncertainty determined by error propagation, most of which came  
10 from the chemiluminescence NO<sub>x</sub> analyzer, was estimated to be 20% RSD.

11 Measurements of other trace gases, such as NO<sub>y</sub> (total reactive nitrogen measured by catalytic conversion),  
12 NO<sub>x</sub>, and O<sub>3</sub>, wind direction, temperature, and boundary layer height were made by Atmospheric Research  
13 & Analysis, Inc. (ARA) as described by Hidy et al. (2014). Boundary layer heights were calculated by ARA  
14 using LIDAR back-scatter measurements from a Lufft CHM 15k ceilometer. Total isoprene hydroxynitrate  
15 (IN) concentrations were determined by Purdue University using a chemical ionization mass spectrometer  
16 (CIMS) with operating conditions described by Xiong et al. (2015). VOC measurements, including  
17 isobutane, isopentane, MACR and isoprene were measured by NOAA ESRL Chemical Sciences Division  
18 and University of California, Berkeley (Goldstein group) using a GC-MS. Particle-phase organic nitrates  
19 (pONs) were measured by University of California, Berkeley (Cohen group) using thermal dissociation  
20 laser-induced fluorescence (TD-LIF), described by Rollins et al. (2010), and by University of Colorado  
21 with a high resolution time of flight aerosol mass spectrometer (HR-ToF-AMS) described by DeCarlo et al.  
22 (2006) and Hu et al. (2015). A comparison in Lee et al. (2016) found that the pONs-TD-LIF was generally  
23 higher by factor ~5 than pONs-HR-ToF-AMS. Both sets of data provide a reasonable range of pONs  
24 concentration. Total OA mass was measured using HR-ToF-AMS.

### 25 **3. Results**

#### 26 **3.1 General behavior of PANs in 2013**

27 Figure 1 shows a time series of PAN, PPN, and MPAN throughout the campaign. Data that were below  
28 detection limit (BDL) are plotted at half of the reported detection limit for that compound. This was done  
29 to distinguish the BDL points from missing data due to tests, calibrations, and the periodic existence of a  
30 noise interference that often appeared during this campaign and could not be eliminated, and to not lose the  
31 low concentration information content. Relatively high levels of PAN were observed as periodic spikes

1 during the campaign, but overall PAN levels were lower than most other measurements in the southeast  
2 made over the last 20 years (see Sect. 3.2). A local biomass burning event was observed on June 4<sup>th</sup>  
3 (Washenfelder et al., 2015), which resulted in an unusually high level of PAN of around 1600 pptv and an  
4 extreme deviation from the median. Hence, the data on June 4<sup>th</sup> was removed from statistical analyses.

5 General descriptive statistics for all daytime data are summarized in Table 1. Daytime was defined as 10  
6 am to 4 pm local time (CDT). PAN was consistently the most abundant peroxyacyl nitrate compound, the  
7 mean daytime levels accounting for approximately 90% of total PANs. In Table 1, “PANs” describes the  
8 sum of individual PAN, PPN, and MPAN values. The average of the ratio of PANs/NO<sub>y</sub> during daytime  
9 was 0.16. Peroxyacryloyl nitrate (APAN) was also observed occasionally during the campaign. APAN has  
10 been proposed to arise from 1,3-butadiene, either from anthropogenic sources or biomass burning, and from  
11 direct emission of acrolein (Roberts et al., 2001; Tanimoto and Akimoto, 2001). Our data did not show a  
12 strong relationship to biomass burning events, as identified by Washenfelder et al. (2015), although an  
13 instrument interference problem limited the amount of reportable APAN data, so no clear conclusion can  
14 be drawn.

15 Although sampled air most frequently came from the south during the SOAS 2013 campaign, air from  
16 the north contained levels of PANs that were twice as large as from south. The averages of PAN, PPN, and  
17 MPAN with air from the north were 182, 5.3, and 8.4 pptv respectively, while averages of air from south  
18 showed 94.6, 2.8, and 3.6 pptv. Polar plots of PAN, PPN and MPAN as a function of surface wind direction  
19 are shown in Figure S3 with wind frequency. This elevated northern distribution is also seen with NO<sub>x</sub> and  
20 O<sub>3</sub> reflecting the influence of anthropogenic pollution sources from Tuscaloosa, Birmingham, and Atlanta.

21 Plots of diurnal mean separated by surface wind direction (Figure 2) indicate a noticeable pattern in PAN,  
22 PPN, and MPAN from the north and a much weaker pattern in southerly air. Levels of all three PANs were  
23 highest (also with greatest variance) during the daytime on average. The diurnal cycle for PPN was less  
24 pronounced because of the low concentrations observed over the campaign. The PAN diurnal pattern was  
25 generally similar to those reported for Nashville in 1995 and 1999 (Nouaime et al., 1998; Roberts, 2002)  
26 resulting from early morning breakup of a nocturnal inversion that was commonly observed at the site.  
27 Similar behavior is observed at SOAS in ozone, NO<sub>x</sub>, and isoprene. The diurnal behavior and mid-day  
28 means of PAN/NO<sub>y</sub> are very similar between the Dickson site and the SOAS site (Figure S4a).

29 A calculation of PAN thermal decomposition lifetime using ambient temperature and [NO]/[NO<sub>2</sub>] shows  
30 that the effective lifetime changes little over the course of the afternoon, which suggests that PAN levels  
31 fluctuate during early afternoon mostly due to dilution by boundary layer growth. Boundary layer height  
32 increased by a factor of 2-3 from 9am to 3pm on average based on LIDAR measurements.



### 1 3.2 Historical PANs measurements in the Southeastern US over last 23 years

2 PAN compounds have been measured at various rural and urban locations within the Southeastern U.S.  
3 over the last 23 years. Observations from six sites, Elberton (GA) 1990; ROSE (AL) 1990 and 1992; New  
4 Hendersonville (TN) 1994; Youth Inc. (TN) 1995; Dickson (TN) 1999; Cornelia Fort Airpark (TN) 1999  
5 are compared here with SOAS 2013 data (a map of the locations is shown in Figure S2 and descriptive  
6 statistics of PANs and other trace gases are summarized in Table 1).

7 Binned PAN concentrations during the daytime (10 am – 4 pm) are plotted as a function of the concentration  
8 of NO<sub>x</sub> (grouped into deciles) in Figure 3a. Urban areas have higher PAN and NO<sub>x</sub> concentrations than  
9 rural areas. The only site sampled in more than one year was ROSE, where PAN levels in 1990 were more  
10 than twice as high as in 1992. Overall, the PAN concentrations were variable between sites and years. A  
11 log-normal curve fit of the data in Figure 3a shows an asymmetric peak in the concentration at around 3.5  
12 ppb NO<sub>x</sub>. PAN concentration increases approximately linearly with NO<sub>x</sub> up to 2 ppb and beyond the peak  
13 it decreases slowly with further increases in NO<sub>x</sub>. Similar behavior was observed in the relationship between  
14 O<sub>3</sub> and NO<sub>x</sub> concentration in Figure 3b with a maximum around 1.5 ppb NO<sub>x</sub>.

15 The relationship of O<sub>3</sub> production with NO<sub>x</sub> and VOC concentrations is typically discussed in terms of  
16 “NO<sub>x</sub>-limited” and “VOC-limited” regimes, (Finlayson-Pitts and Pitts, 2000; Milford et al., 1994;  
17 Chemeides et al., 1992), although there has been less discussion of the sensitivity of PAN production to  
18 these reactants. This curve is reminiscent of the modeled O<sub>3</sub> production rate as a function of NO<sub>x</sub> and HO<sub>x</sub>  
19 in Thornton et al. (2002) from OH oxidation of VOC based on measurements from Cornelia Fort Airpark  
20 in 1999. At low NO concentration, O<sub>3</sub> production rate increases with NO, since OH is regenerated via  
21 HO<sub>2</sub>+NO and the primary chain termination are HO<sub>x</sub>+HO<sub>x</sub> reactions. On the other hand, O<sub>3</sub> production rate  
22 slows at higher NO concentrations when OH is consumed, because HO<sub>x</sub>+NO<sub>x</sub> and RO<sub>2</sub> + NO reactions  
23 (Romer et al., 2016) become faster than HO<sub>x</sub>+HO<sub>x</sub> reactions. The peak in Figure 3 is related to the crossover  
24 point between NO<sub>x</sub>-limited and NO<sub>x</sub>-saturated. A high HO<sub>x</sub> production rate enhances the O<sub>3</sub> production rate  
25 with NO for low NO and the crossover point shifts to higher NO. The relationship based on field data in  
26 Figure 3 is phenomenological and reflects a complex combination of production and loss processes.  
27 Untangling the exact mechanisms that contribute to the observed behavior were not investigated, although  
28 several mechanisms could contribute. For instance, older air masses would reflect different PAN/NO<sub>x</sub> ratios.  
29 Based on average PAN/NO<sub>y</sub> ratios (Figure S4a), the air masses experienced at Dickson and SOAS were of  
30 similar ages. Differential loss rates for PAN and NO<sub>x</sub> or overall shorter lifetimes could yield lower absolute  
31 values and could also influence this ratio. As seen in Figure 1, and explained in Hidy et al. (2014), ozone,  
32 NO<sub>x</sub>, and photolysis rates were all lower at this ground site than in previous years, which likely results in

1 lower overall oxidation rates due to lower radical production rate. Lower radical production rate also  
2 increases the isoprene lifetime and leads to larger mid-day average levels of isoprene than seen in other SE  
3 ground sites (Table 1).

4 The covariance between PAN and O<sub>3</sub> (Bottenheim et al., 1994) due to their common photochemical  
5 pathway in the atmosphere suggests that the steep increase of PAN concentrations with NO<sub>x</sub> at low NO<sub>x</sub> in  
6 Figure 3a could result from NO<sub>x</sub>-limited chemistry. Most rural sites showed PAN levels more sensitive to  
7 NO<sub>x</sub> concentrations. The slow decrease of PAN concentration at higher NO<sub>x</sub> levels such as those seen at  
8 more urban sites could result from faster radical termination rates, and thus slower VOC oxidation rates.  
9 This empirically-derived distinction is likely related to differences in reaction rates with peroxy radicals  
10 that could be investigated computationally. PAN, O<sub>3</sub> and NO<sub>x</sub> levels in the Southeast were all lowest at  
11 SOAS 2013. As NO<sub>x</sub> levels continue to decrease in the country (Blanchard et al., 2012; Russell et al., 2012;  
12 USEPA), PAN production rates might become more widely sensitive to NO<sub>x</sub>. Emission inventories for  
13 anthropogenic VOC emissions has steadily decreased in the southeast over the last few decades. Mean  
14 isobutane and isopentane levels measured at the Centreville site were 70% lower in 2013 than in 1993.  
15 (Hagerman et al., 1997) VOC measurements at SEARCH sites show more consistent BVOC levels over the  
16 same time (Hagerman et al., 1997; Hidy et al., 2014; USEPA; E. Edgerton unpublished data).

### 17 3.3 Anthropogenic vs Biogenic contribution to PAN production

#### 18 3.3.1 Description of MLR and its Statistical Meaning

19 A multiple linear regression (MLR) has been used to quantify PAN precursors (Roberts, 2002; Roberts et  
20 al., 1998; Williams et al., 1997). Since the thermal decomposition rates of PANs are similar (Roberts and  
21 Bertman, 1992), and MPAN and PPN are formed from BHC and AHC respectively and PAN is formed  
22 from both, [PAN] can be approximately represented as a weighted linear combination of [MPAN] and  
23 [PPN]. The combination of BHC and AHC chemistry is indicated by MPAN and PPN. The linear model is  
24 applied as in equation 1.

$$25 [PAN] = A + B_1[MPAN] + B_2[PPN] \quad (1)$$

26 Here,  $A$  is the intercept (describing background PAN levels) and  $B_1$  and  $B_2$  are partial regression coefficients,  
27 estimated using a computer software program based on field observations. The MLR statistical analysis  
28 includes estimation of  $A$ ,  $B_1$  and  $B_2$ , overall  $F$ -test and a  $t$ -test, and diagnostic procedures (e.g. Mendenhall  
29 et al., 2008). The  $F$ -test is used to investigate the statistical significance of the model in Equation (1) using  
30 an analysis of variance (ANOVA) table. The strength of the model is evaluated using the coefficient of  
31 determination  $R^2$  between predicted and measured [PAN] (also provided through this statistical analysis).

1 The individual  $t$ -test, which is based on the Student's  $t$  statistic, is used to investigate the statistical  
2 significance of the individual  $B_1$  and  $B_2$ . In a MLR statistical analysis, the magnitude of the standardized  
3 partial regression coefficients,  $\beta_i$ , which is calculated as a product of partial regression coefficient and the  
4 ratio between the standard deviation of the respective independent variable (MPAN or PPN) and the  
5 standard deviation of the dependent variable (PAN), is frequently used to compare the relative contribution  
6 of independent variables. The results of MLR statistical analysis are summarized in Tables S1 and S2.

7 Tatsuoka (1971) showed that  $R^2$  from the MLR is equal to the sum of the product of the  $\beta_i$  and the zero-  
8 order (simple bivariate) correlation,  $r_i$ , which are obtained as results of MLR (see Table S2). That is,  $R^2 =$   
9  $\sum \beta_i r_i$ . Therefore, we used the fraction of  $R^2$  based on the strength of relationship in each [MPAN] and  
10 [PPN] to [PAN] to describe the relative importance of BHC and AHC. Each partial  $R^2$  is obtained as shown  
11 in equations 2 and 3.

$$12 R^2_{BHC} = \beta_1 r_{MPAN \text{ vs. } PAN} \quad (2)$$

$$13 R^2_{AHC} = \beta_2 r_{PPN \text{ vs. } PAN} \quad (3)$$

14 This approach allows us to directly treat the  $R^2$  in the MLR to assess the relative importance of BHC and  
15 AHC, including the strength of correlation with PAN.

16 Results from SOAS were compared with similar PAN data collected from Dickson, TN in 1999, another  
17 rural southeastern site, which show that the MLR model and regression coefficients for both MPAN and  
18 PPN at both sites were statistically significant (see Tables S1 and S2). During SOAS 2013, 60% of the  
19 variance in the measurements was explained by the MLR model. At the Dickson site in 1999, 77% of the  
20 variance was explained by the MLR model. The  $R^2$  of MLR in the SOAS 2013 data was lower than that in  
21 Dickson 1999, which might result from the lower absolute PANs levels during SOAS 2013. In particular,  
22 SOAS MPAN and PPN data included a large number of below detection limit measurements, while Dickson  
23 1999 data did not. The means of PAN, MPAN, and PPN in Dickson 1999 were three times higher than the  
24 mean for SOAS 2013, while  $\text{NO}_x$  levels were five times higher (see Table 1). In Figure 4, the relative  
25 importance of BHC and AHC was standardized to compare SOAS 2013 and Dickson 1999. Standardized  
26 relative percentiles were calculated as  $R^2_{BHC}/R^2 \times 100$  for BHC and  $R^2_{AHC}/R^2 \times 100$  for AHC. Biogenic  
27 influence accounted for 66% of PAN during SOAS 2013 and was two times larger than the anthropogenic  
28 influence. This is the opposite of results from Dickson where the biogenic influence (mostly isoprene)  
29 accounted for only 25% of PAN. Although both sampling locations were located in rural areas in similar  
30 environments, the results using MLR indicate that the HC precursors were different.

### 31 3.3.2 Comparison of contribution of isoprene oxidation with computational modeling

1 We used two computational approaches to assess the contribution of isoprene oxidation to PAN formation  
2 by 1) orthogonal distance regression (ODR) between field measurements of MPAN and PAN and 2)  
3 simulation of the production of peroxyacetyl (PA) radicals, precursors of PAN, using an ambient 0-D  
4 photochemical model.

5 In ODR, the fraction of PAN production from isoprene oxidation can be expressed as  
6  $(d[\text{PAN}]_{\text{isoprene}}/dt)/(d[\text{PAN}]_{\text{all}}/dt)$ . Assuming that MPAN is solely derived from isoprene oxidation, the  
7 relative yield of  $(d[\text{MPAN}]/dt)/(d[\text{PAN}]_{\text{isoprene}}/dt)$  was obtained from an isoprene oxidation chamber  
8 experiment as  $0.15 \pm 0.03$  RSD. The reaction was initiated with 1.37 ppm isoprene, 268 ppb NO, and 206  
9 ppb NO<sub>2</sub> under 5% RH in a 5.5 m<sup>3</sup> Teflon cylindrical bag. The OH radical was produced by photolysis of  
10 HONO. The fraction of PAN production from isoprene oxidation to total PAN formation in the field was  
11 rearranged as the following equation.

$$12 \frac{d[\text{PAN}]_{\text{isoprene}}/dt}{d[\text{PAN}]_{\text{all}}/dt} = 6.7 \times \frac{d[\text{MPAN}]/dt}{d[\text{PAN}]_{\text{all}}/dt} \quad (4)$$

13 The  $(d[\text{MPAN}]/dt)/(d[\text{PAN}]_{\text{all}}/dt)$  was obtained from measurements in SOAS 2013 as the slope of the linear  
14 regression line of [MPAN] to [PAN].

15 In the 0-D photochemical model simulation, the relative contribution to peroxyacetyl (PA) radicals from  
16 VOCs present at the field site is based on the Master Chemical Mechanism (MCM) v3.3. The ambient  
17 model included not only isoprene and its oxidation products (including CH<sub>3</sub>C(O)CHO) but also acetone,  
18 acetaldehyde, and some mono-terpenes as precursors. The detail of the parameters for MCM set are  
19 described in Groff (2015).

20 These two methods were compared with the relative importance of BHC,  $\beta_{1\text{MPANvs.PAN}}$ , from the MLR  
21 model in this work. Four days (Jun 3<sup>rd</sup> 12:30 – 18:00, Jun 14<sup>th</sup> 11:30 – 18:00, Jun 26<sup>th</sup> 11:00 – 18:00, and  
22 Jul 12<sup>th</sup> 13:00 – 18:00) of data from SOAS 2013 were selected to run the 0-D model because the production  
23 ratio using ODR can only be used when PAN, MPAN and NO<sub>x</sub> concentrations were appropriately high.  
24 The time ranges were chosen so that the boundary layer height would be stable and any dilution effect  
25 would be minimal. Results of the comparison are plotted in Figure 5. Although the relative importance of  
26 BHC in the MLR model was less than 40% on June 3<sup>rd</sup>, it was statistically dominant on the other three days  
27 accounting for more than 68%. (Note: PPN on June 3<sup>rd</sup> did not have a significant level to predict PAN in  
28 MLR analysis,  $p=0.600$ .) By comparison, the estimated contribution of isoprene oxidation using ODR on  
29 June 3<sup>rd</sup> had the steepest slope, however, the range of the 95% confidence interval (C.I.) on this day was  
30 large. On the other three days, the relative contributions of isoprene oxidation using ODR were estimated  
31 at 23 – 49%, lower than the results derived from the other two methods. This might be due to the differences

1 between the chamber experiment and ambient conditions. Specifically, the ratio of secondary to primary  
2 oxidation products varies between chamber and ambient conditions, with likely relatively greater primary  
3 products under chamber conditions. Since PAN is formed via the oxidation of secondary products of  
4 isoprene, the  $[\text{MPAN}]/[\text{PAN}]_{\text{isoprene}}$  ratio would be higher in the chamber experiment than in ambient  
5 environment. This ratio is expected to derive results that are biased low, when used to estimate the ambient  
6 isoprene-derived PAN concentration. In addition, photolysis rates also are significantly different between  
7 the chamber and the field conditions. The results of the 0-D model suggest that isoprene oxidation  
8 significantly contributed to PAN formation with a mean range of 55–73% over all selected days. Hence,  
9 both methods, the MLR and the 0-D model, indicate that isoprene oxidation was the main source when high  
10 levels of PAN were observed during SOAS 2013.

## 11 4. Discussion

### 12 4.1 Comparison among MACR, IN, and MPAN

13 MACR is a first generation product of isoprene photooxidation mechanisms, and MPAN is derived from  
14 MACR oxidation (Bertman and Roberts, 1991; Kjaergaard et al., 2012). With enough  $\text{NO}_x$ , the OH adduct  
15 of isoprene that is the precursor to MACR in these mechanisms is also a precursor of gas-phase isomers of  
16 isoprene hydroxynitrates (IN) (Shepson, 2007; Grossenbacher et al., 2001, 2004; Barker et al., 2003; Paulot  
17 et al., 2009; Lockwood et al., 2010). Xiong et al. (2015) reported IN at SOAS, which affords the opportunity  
18 to study this aspect of  $\text{NO}_x$  sensitivity of isoprene oxidation. In this work, the daytime (10 am – 4 pm)  
19 relationships among MPAN, MACR and IN at SOAS was investigated using the Pearson's correlation  
20 statistical test. Missing data was treated as pairwise deletion (not listwise deletion). The correlation  
21 coefficient between the first generation products of isoprene, MACR and IN was 0.528 ( $p < 0.001$ ) and  
22 indicated a statistically significant positive correlation, as would be expected. According to the known  
23 chemical pathways, a strong relationship is expected between MACR and MPAN, while a weak relationship  
24 is expected between IN and MPAN given that IN is a primary product, while MPAN is secondary. The  
25 results show, however, that daytime data over the whole campaign did not show a statistically significant  
26 correlation between MACR and MPAN ( $r = 0.148$ ,  $p = 0.104$ ). In contrast, IN has a statistically significant  
27 positive correlation with MPAN ( $r = 0.499$ ,  $p < 0.001$ ). Likely this relationship is a result of the  $\text{NO}_x$   
28 dependence of both organic nitrate products. Because MACR can be produced in the absence of  $\text{NO}_x$  (Paulot  
29 et al., 2009b; Liu et al., 2013; Mao et al., 2013), MPAN is more dependent on  $\text{NO}_x$  than on MACR at this  
30 site, and isoprene nitrates constitute a larger fraction of gas-phase organic nitrates from BVOC than MPAN  
31 does, consistent with Romer et al. (2016). Figure 6 shows that the IN/MPAN ratio varies over a large range

1 when  $\text{NO}_x < 1 \text{ ppb}$ , corresponding to the range of high  $\text{P}(\text{HO}_x)$  described by Thornthorn et al., (2002). At  
2 higher  $\text{NO}_x$  levels, the ratio remains fairly constant around 2.5-3. This figure is suggestive of different  
3 chemical regimes operating under different  $\text{NO}_x$  conditions, reminiscent of the behavior of differential  
4 alkane loss when dominated either by OH or halogen chemistry in Jobson et al., (1994). The higher loss  
5 rate for MPAN expected with higher levels of  $\text{HO}_x$  may drive the IN/MPAN ratio at lower  $\text{NO}_x$  levels.

## 6 7 **4.2 Gas-phase MPAN vs. organic aerosol mass**

8 During SOAS 2013, Lee et al. (2016) estimated that the particle-phase organic nitrates (pONs) accounted  
9 for 3% of total organic aerosol (OA) mass, on average, during the day (12 pm – 4 pm) and BVOC precursors  
10 strongly impacted the diel trends of pONs. Laboratory experiments suggest that MPAN can play a key role  
11 in SOA formation under high  $\text{NO}_x$  conditions. C4-hydroxynitrate-PAN or hydroxymethyl-methyl- $\alpha$ -  
12 lactone (HMML) (Kjaergaard et al., 2012; Nguyen et al., 2015; Wennberg et al., 2018) and **methacrylic**  
13 **acid epoxide (MAE)** (Worton et al., 2013) have been proposed as precursors for uptake into the particle-  
14 phase from MPAN oxidation. Nguyen and co-workers (2015) estimated the SOA yield as approximately  
15 ~60 % by mole from MPAN + OH reaction in the absence of  $\text{NO}_x$ . IN is also expected to contribute to SOA  
16 formation (Jacobs et al., 2014). Organic nitrate involvement in SOA formation suggests a relationship  
17 between gas-phase MPAN and IN with particle mass, although the nitrogen could be unretained in the  
18 particle. Figure 7a&b shows the relationship of gas-phase MPAN and IN with daytime particle  
19 measurements. As MPAN and IN concentrations increase, Figures 7a&b show that OA mass increases,  
20 while pONs mass increases very little (measured by both HR-ToF-AMS and TD-LIF), although the slopes  
21 of MPAN and IN vs. pONs are statistically different from zero. The relative magnitude of the response of  
22 OA and pONs to increases in MPAN and IN suggests that they may contribute to OA growth more than to  
23 pONs growth. Although this may suggest that if MPAN oxidation by OH is involved in particle growth, the  
24 nitrogen from MPAN is not represented in aerosol organic nitrate. Oxidation of MPAN modeled from  
25 MACR + OH results at FIXCIT (Nguyen et al., 2014) using measured total peroxy nitrates and kinetics of  
26 the isoprene mechanism in MCM v3.3.1 (Jenkin et al., 2015) showed a positive relationship between MPAN  
27 oxidation and pONs formation, although with a yield <3% (P. Romer, personal communication). Results of  
28 direct reaction of MPAN + OH suggest that it is unlikely that pONs formation is mainly derived from  
29 MPAN+OH reaction, even in the presence of  $\text{NO}_x$  (Nguyen and Wennberg, personal communication). This  
30 small contribution of isoprene oxidation compounds to pONs formation is consistent with reported  
31 modelling of pONs formation (Xu et al., 2015; Ayres et al., 2015; Pye et al., 2015). Ayres et al. (2015)  
32 suggest that pONs formation at SOAS was dominated by nighttime reactions of  $\text{NO}_3$  radicals with BVOCs

1 rather than daytime reactions, and more from monoterpene oxidation than isoprene oxidation. MPAN  
2 uptake on aerosols results in the formation of aerosol-phase organo-sulfates (Worton et al., 2013), which  
3 also contributes to the weak dependence of pONs on MPAN.

4 Rather, MPAN is likely a precursor of low vapor pressure products that undergo aerosol uptake. The  
5 correlation between INs and MPAN with OA may reflect that much of the OA derives from BVOC  
6 oxidation, and the conditions that lead to large rates of BVOC emission and oxidation (high T and radiation)  
7 simultaneously produce OA, along with INs and MPAN. That OA does not correlate well with condensed  
8 phase organic nitrate reflects the fast hydrolysis of organic nitrates in the aerosol phase at low aerosol pH  
9 (Rindelaub et al., 2016; Jacobs et al., 2014; Guo et al., 2015) While organic nitrates such as the INs may  
10 partition to the aerosol phase, they are quickly converted to inorganic nitrate ion and other products by  
11 hydrolysis.

12 **5. Conclusions**

13 The level of PAN compounds measured at the ground site during SOAS 2013 is lower than measured in the  
14 Southeastern U.S. over the past two decades. We show here that PAN concentrations at SOAS were limited  
15 by NO<sub>x</sub> availability. Russell et al. (2012) show that NO<sub>x</sub> in the eastern US has been decreasing rapidly, due  
16 to effective emission control, and lower NO<sub>x</sub> levels seem to result in lower ambient PAN concentrations.  
17 As this process continues, PAN may continue to be a smaller fraction of NO<sub>y</sub>, as peroxy radicals such as  
18 CH<sub>3</sub>C(O)OO react with HO<sub>2</sub> and RO<sub>2</sub> rather than with NO<sub>x</sub>. PAN appears to be most sensitive up to [NO<sub>x</sub>]  
19 approximately 3.5 ppb, above which PAN concentrations switch to a NO<sub>x</sub>-saturated (or VOC-limited)  
20 regime. Overall, MPAN did not show a statistically significant correlation with MACR, but did show a  
21 statistically positive correlation with IN. These results indicate that both organic nitrate products were NO<sub>x</sub>  
22 dependent (MPAN being more sensitive to NO<sub>x</sub> than to MACR precursor) at SOAS.

23 We estimate that biogenic precursors, particularly isoprene, account for more than half of PANs and that  
24 gas-phase MPAN shows a correlation with OA growth consistent with laboratory and chamber studies, but  
25 less correlation with nitrogen-containing pONs during the daytime. This may suggest that the nitrogen of  
26 MPAN is removed during oxidation to other low vapor pressure products involved in particle growth, as  
27 suggested by the HMML (Kjaergaard et al., 2012) and MAE mechanisms (Worton et al., 2013).

28 **6. Acknowledgments**

29 This research was supported by EPA STAR grant 83540901-0-RD. We thank the people of SOAS 2013  
30 campaign. We thank Drs. James Roberts, David Parrish, Eric Williams, and Martin Buhr for providing

1 NOAA data of PANs and other trace gases from Elberton, ROSE, Henderson, and Cornelia Fort ground  
2 sites. We thank Tran Nguyen and Paul Wennberg for sharing data from FIXCIT. WWH and JLJ were  
3 supported by NSF AGS-1822664 and EPA STAR 83587701-0. This publication was developed under  
4 Assistance Agreements awarded by the U.S. Environmental Protection Agency. It has not been formally  
5 reviewed by EPA. The views expressed in this document are solely those of the authors and do not  
6 necessarily reflect those of the Agency. EPA does not endorse any products or commercial services  
7 mentioned in this publication. NSF grant AGS-1352972 supported Cohen group work at UC Berkeley.  
8 VOC measurements at the SEARCH Jefferson Street (Atlanta) site were funded by Southern Company  
9 Services, Inc. (Birmingham, AL, USA) and the Electric Power Research Institute (Palo Alto, CA, USA).

10

## 11 7. References

12

13 Ayres, B. R., Allen, H. M., Draper, D. C., Brown, S. S., Wild, R. J., Jimenez, J. L., Day, D. A.,  
14 Campuzano-Jost, P., Hu, W., de Gouw, J., Koss, A., Cohen, R. C., Duffey, K. C., Romer, P., Baumann,  
15 K., Edgerton, E., Takahama, S., Thornton, J. A., Lee, B. H., Lopez-Hilfiker, F. D., Mohr, C., Wennberg,  
16 P. O., Nguyen, T. B., Teng, A., Goldstein, A. H., Olson, K. and Fry, J. L.: Organic nitrate aerosol  
17 formation via  $\text{NO}_3$  + biogenic volatile organic compounds in the southeastern United States, *Atmos.*  
18 *Chem. Phys.*, 15(23), 13377–13392, doi:10.5194/acp-15-13377-2015, 2015.

19 Barker, J. R., Lohr, L. L., Shroll, R. M. and Reading, S.: Modeling the Organic Nitrate Yields in the  
20 Reaction of Alkyl Peroxy Radicals with Nitric Oxide. 2. Reaction Simulations, *J. Phys. Chem. A*,  
21 107(38), 7434–7444, doi:10.1021/jp034638j, 2003.

22 Barket, D. J., Jr., Grossenbacher, J. W., Hurst, J. M., Shepson, P. B., Olszyna, K., Thornberry, T., Carroll,  
23 M. A., Roberts, J., Stroud, C., Bottenheim, J. and Biesenthal, T.: A study of the  $\text{NO}_x$  dependence of  
24 isoprene oxidation, *J. Geophys. Res.*, 109(D11310), doi:10.1029/2003JD003965, 2004.

25 Baumann, K., Williams, E. J., Angevine, W. M., Roberts, J. M., Norton, R. B., Frost, G. J., Fehsenfeld, F.  
26 C., Springston, S. R., Bertman, S. B. and Hartsell, B.: Ozone production and transport near Nashville,  
27 Tennessee: Results from the 1994 study at New Hendersonville, *J. Geophys. Res.*, 105(D7), 9137–9153,  
28 doi:10.1029/1999JD901017, 2000.

29 Bertman, S. B. and Roberts, J. M.: A PAN analog from isoprene photooxidation, *Geophys. Res. Lett.*,  
30 18(8), 1461–1464, 1991.

31 Biesenthal, T. A. and Shepson, P. B.: Observations of anthropogenic inputs of the isoprene oxidation  
32 products methyl vinyl ketone and methacrolein to the atmosphere, *Geophys. Res. Lett.*, 24(11), 1375–  
33 1378, doi:10.1029/97GL01337, 1997.

34 Blanchard, C L, Hidy, G M, Tanenbaum, S, Edgerton, E S, Hartsell, B E, The Southeastern Aerosol  
35 Research and Characterization (SEARCH) study: Temporal trends in gas and PM concentrations and  
36 composition, 1999-2010, *J. Air Waste Manage Assoc.*, 63, 247-259 (2012),

37 Bottenheim, J. W., Sirois, A., Brice, K. A. and Gallant, A. J.: Five years of continuous observations of  
38 PAN and ozone at a rural location in eastern Canada, *J. Geophys. Res.*, 99(D3), 5333–5352,  
39 doi:10.1029/93JD02716, 1994.



- 1 Buhr, M., Parrish, D., Elliot, J., Holloway, J., Carpenter, J., Goldan, P., Kuster, W., Trainer, M., Montzka,  
2 S., McKeen, S. and Fehsenfeld, F.: Evaluation of ozone precursor source types using principal  
3 component analysis of ambient air measurements in rural Alabama, *J. Geophys. Res.*, 100(D11),  
4 22853–22860, doi:10.1029/95JD01837, 1995.
- 5 Cantrell, C. A., Lind, J. A., Shetter, R. E., Calvert, J. G., Goldan, P. D., Kuster, W., Fehsenfeld, F. C.,  
6 Montzka, S. A., Parrish, D. D., Williams, E. J., Buhr, M. P., Westberg, H. H., Allwine, G. and Martin,  
7 R.: Peroxy radicals in the ROSE experiment: Measurement and theory, *J. Geophys. Res.*, 97(D18),  
8 20671–20686, doi:10.1029/92JD01727, 1992.
- 9 Carlton, A.G., de Gouw, J., Jimenez, J.L., Ambrose, J.L., Attwood, A.R., Brown, S., Baker, K.R., Brock,  
10 C., Cohen, R.C., Edgerton, S., Farkas, C., Farmer, D., Goldstein, A.H., Gratz, L., Guenther, A., Hunt,  
11 S., Jaeglé, L., Jaffe, D.A., Mak, J., McClure, C., Nenes, A., Nguyen, T.K., Pierce, J.R., De Sa, S., Selin,  
12 N.E., Shah, V., Shaw, S., Shepson, P.B., Song, S., Stutz, J., Surratt, J., Turpin, B.J., Warneke, C.,  
13 Washenfelder, R.A., Wennberg, P.O., Zhou, X.: Synthesis of the Southeast Atmosphere Studies:  
14 Investigating Fundamental Atmospheric Chemistry Questions, *Bul. Am. Met. Soc.*, 99(3): 547-567,  
15 doi:10.1175/BAMS-D-16-0048.1., 2018.
- 16 Carter, W. P. and Atkinson, R.: Development and evaluation of a detailed mechanism for the atmospheric  
17 reactions of isoprene and NO<sub>x</sub>, *Int. J. Chem. Kinet.*, 28(7), 497–530, 1996.
- 18 Carter, W. P. L., Winer, A. M. and Pitts, J. N.: Effect of peroxyacetyl nitrate on the initiation of  
19 photochemical smog, *Environ. Sci. Technol.*, 15(7), 831–834, doi:10.1021/es00089a010, 1981.
- 20 Chan, A. W. H., Chan, M. N., Surratt, J. D., Chhabra, P. S., Loza, C. L., Crounse, J. D., Yee, L. D.,  
21 Flagan, R. C., Wennberg, P. O. and Seinfeld, J. H.: Role of aldehyde chemistry and NO<sub>x</sub> concentrations  
22 in secondary organic aerosol formation, *Atmos. Chem. Phys.*, 10(15), 7169–7188, doi:10.5194/acp-10-  
23 7169-2010, 2010.
- 24 Chameides, W. L., Fehsenfeld, F., Rodgers, M. O., Cardelino, C., Martinez, J., Parrish, D., Lonneman,  
25 W., Lawson, D. R., Rasmussen, R. A., Zimmerman, P., Greenberg, J., Middleton, P. and Wang, T.:  
26 Ozone precursor relationships in the ambient atmosphere, *J. Geophys. Res.*, 97(D5), 6037–6055,  
27 doi:10.1029/91JD03014, 1992.
- 28 Chen, W.: PAN, PPN and MPAN measurements and the quantitative relationship of PAN and MPAN in  
29 biogenic hydrocarbon conditions (Master's thesis), Western Michigan University, Kalamazoo. 2001.
- 30 Cowling, E. B., Chameides, W. L., Kiang, C. S., Fehsenfeld, F. C. and Meagher, J. F.: Introduction to  
31 special section: Southern Oxidants Study Nashville/Middle Tennessee Ozone Study, *J. Geophys. Res.*,  
32 103(D17), 22209–22212, doi:10.1029/98JD01770, 1998.
- 33 DeCarlo, P. F., Kimmel, J. R., Trimborn, A., Northway, M. J., Jayne, J. T., Aiken, A. C., Gonin, M.,  
34 Fuhrer, K., Horvath, T., Docherty, K. S., Worsnop, D. R. and Jimenez, J. L.: Field-Deployable, High-  
35 Resolution, Time-of-Flight Aerosol Mass Spectrometer, *Anal. Chem.*, 78(24), 8281–8289,  
36 doi:10.1021/ac061249n, 2006.
- 37 Jacobs, M. I., Burke, W. J. and Elrod, M. J.: Kinetics of the reactions of isoprene-derived hydroxynitrates:  
38 gas phase epoxide formation and solution phase hydrolysis, *Atmos. Chem. Phys.*, 14(17), 8933–8946,  
39 doi:10.5194/acp-14-8933-2014, 2014.
- 40 Finlayson-Pitts, B. J. and Pitts, J. N., Jr: *Chemistry of the Upper and Lower Atmosphere: theory,*  
41 *experiments, and applications*, Academic Press, 2000.
- 42 Frost, G. J., Trainer, M., Allwine, G., Buhr, M. P., Calvert, J. G., Cantrell, C. A., Fehsenfeld, F. C.,  
43 Goldan, P. D., Herwehe, J., Hübler, G., Kuster, W. C., Martin, R., Mcmillen, R. T., Montzka, S. A.,  
44 Norton, R. B., Parrish, D. D., Ridley, B. A., Shetter, R. E., Watkinds, J. G., Westberg, H. H. and

- 1 Williams, E. J.: Photochemical ozone production in the rural southeastern United States during the 1990  
2 Rural Oxidants in the Southern Environment (ROSE) program, *J. Geophys. Res.*, 103(D17), 22491–  
3 22508, doi:<https://doi.org/10.1029/98JD00881>, 1998.
- 4 Groff, C.: Impact of Biogenic Volatile Organic Compounds on Peroxyacetyl Nitrate Production in the  
5 Southeast United States (Master's Thesis), Purdue University, West Lafayette. 2015.
- 6 Grossenbacher, JW, Barket, , Shepson, Carroll, Olszyna, Apel, A comparison of isoprene nitrate  
7 concentrations at two forest-impacted sites, *J. Geophys. Res.*, 109(D11), 2049, 2004  
8 (<https://doi.org/10.1029/2003JD003966>)
- 9 Guenther, A., Hewitt, C. N., Erickson, D., Fall, R., Geron, C., Graedel, T., Harley, P., Klinger, L., Lerdau,  
10 M., Mckay, W. A., Pierce, T., Scholes, B., Steinbrecher, R., Tallamraju, R., Taylor, J. and Zimmerman,  
11 P.: A global model of natural volatile organic compound emissions, *J. Geophys. Res.*, 100(D5), 8873,  
12 doi:10.1029/94JD02950, 1995.
- 13 Guo, H., Xu, L., Bougiatioti, A., Cerully, K. M., Capps, S. L., Hite, J. R., Jr., Carlton, A. G., Lee, S. H.,  
14 Bergin, M. H., Ng, N. L., Nenes, A. and Weber, R. J.: Fine-particle water and pH in the southeastern  
15 United States, *Atmos. Chem. Phys.*, 15(9), 5211–5228, doi:10.5194/acp-15-5211-2015, 2015.
- 16 Hagerman, L. M.; Aneja, V. P.; Lonneman W., Characterization of non-methane hydrocarbons in the rural  
17 southeast United States, *Atmos Environ*, 31, 4017–4038, 1997.
- 18 Hidy, G. M., Blanchard, C. L., Baumann, K., Edgerton, E., Tanenbaum, S., Shaw, S., Knipping, E.,  
19 Tombach, I., Jansen, J. and Walters, J.: Chemical climatology of the southeastern United States,  
20 1999–2013, *Atmos. Chem. Phys.*, 14(21), 11893–11914, doi:10.5194/acp-14-11893-2014, 2014.
- 21 Hu, W. W., Campuzano-Jost, P., Palm, B. B., Day, D. A., Ortega, A. M., Hayes, P. L., Krechmer, J. E.,  
22 Chen, Q., Kuwata, M., Liu, Y. J., de Sá, S. S., McKinney, K., Martin, S. T., Hu, M., Budisulistiorini, S.  
23 H., Riva, M., Surratt, J. D., St Clair, J. M., Isaacman-Van Wertz, G., Yee, L. D., Goldstein, A. H.,  
24 Carbone, S., Brito, J., Artaxo, P., de Gouw, J. A., Koss, A., Wisthaler, A., Mikoviny, T., Karl, T., Kaser,  
25 L., Jud, W., Hansel, A., Docherty, K. S., Alexander, M. L., Robinson, N. H., Coe, H., Allan, J. D.,  
26 Canagaratna, M. R., Paulot, F. and Jimenez, J. L.: Characterization of a real-time tracer for isoprene  
27 epoxydiols-derived secondary organic aerosol (IEPOX-SOA) from aerosol mass spectrometer  
28 measurements, *Atmos. Chem. Phys.*, 15(20), 11807–11833, doi:10.5194/acp-15-11807-2015, 2015.
- 29 Jacobs, M. I., Burke, W. J. and Elrod, M. J.: Kinetics of the reactions of isoprene-derived hydroxynitrates:  
30 gas phase epoxide formation and solution phase hydrolysis, *Atmos. Chem. Phys.*, 14(17), 8933–8946,  
31 doi:10.5194/acp-14-8933-2014, 2014.
- 32 Jenkin, M. E., Young, J. C. and Rickard, A. R.: The MCM v3.3.1 degradation scheme for isoprene,  
33 *Atmos. Chem. Phys.*, 15(20), 11433–11459, doi:10.5194/acp-15-11433-2015, 2015.
- 34 Jobson, B. T.; Niki, H.; Yokouchi, Y.; Bottenheim, J.; Hopper, F.; Leitch, R., Measurements of C2-C6  
35 hydrocarbons during the Polar Sunrise 1992 Experiment: Evidence for Cl atom and Br atom chemistry  
36 *J. Geophys. Res.* 99 (D12), 25–355–25–368, 1994.
- 37 Kaiser, J.; Skog, K. M.; Baumann, K.; Bertman, S. B.; Brown, S. B.; Brune, W. H.; Crouse, J. D.; de  
38 Gouw, J. A.; Edgerton, E. S.; Feiner, P. A.; Goldstein, A. H.; Koss, A.; Misztal, P. K.; Nguyen, T. B.;  
39 Olson, K. F.; St Clair, J. M.; Teng, A. P.; Toma, S.; Wennberg, P. O.; Wild, R. J.; Zhang, L.; Keutsch,  
40 F. N., Speciation of OH reactivity above the canopy of an isoprene-dominated forest, *Atmos. Chem.*  
41 *Phys.* 16 (14), 9349–9359, 2016.
- 42 Kjaergaard, H. G., Knap, H. C., Ørnsø, K. B., Jørgensen, S., Crouse, J. D., Paulot, F. and Wennberg, P.  
43 O.: Atmospheric Fate of Methacrolein. 2. Formation of Lactone and Implications for Organic Aerosol  
44 Production, *J. Phys. Chem. A*, 116(24), 5763–5768, doi:10.1021/jp210853h, 2012.

- 1 Kleindienst, T. E., Shepson, P. B., Smith, D. F., Hudgens, E. E., Nero, C. M., Cupitt, L. T., Bufalini, J. J.  
2 and Claxton, L. D.: Comparison of mutagenic activities of several peroxyacyl nitrates, *Environ. Mol.*  
3 *Mutagen.*, 16(2), 70–80, 1990.
- 4 LaFranchi, B. W., Wolfe, G. M., Thornton, J. A., Harrold, S. A., Browne, E. C., Min, K. E., Wooldridge,  
5 P. J., Gilman, J. B., Kuster, W. C., Goldan, P. D., de Gouw, J. A., McKay, M., Goldstein, A. H., Ren,  
6 X., Mao, J., Cohen, R. C., Closing the peroxy acetyl nitrate budget: observations of acyl peroxy nitrates  
7 (PAN, PPN, and MPAN) during BEARPEX 2007}, *Atmospheric Chemistry and Physics*, 9, 7623--7641  
8 (2009), DOI = {10.5194/acp-9-7623-2009}
- 9 Lee, B. H., Mohr, C., Lopez-Hilfiker, F. D., Lutz, A., Hallquist, M., Lee, L., Romer, P., Cohen, R. C.,  
10 Iyer, S., Kurtén, T., Hu, W., Day, D. A., Campuzano-Jost, P., Jimenez, J. L., Xu, L., Ng, N. L., Guo, H.,  
11 Weber, R. J., Wild, R. J., Brown, S. S., Koss, A., de Gouw, J., Olson, K., Goldstein, A. H., Seco, R.,  
12 Kim, S., McAvey, K., Shepson, P. B., Starn, T., Baumann, K., Edgerton, E. S., Liu, J., Shilling, J. E.,  
13 Miller, D. O., Brune, W., Schobesberger, S., D'Ambro, E. L. and Thornton, J. A.: Highly functionalized  
14 organic nitrates in the southeast United States: Contribution to secondary organic aerosol and reactive  
15 nitrogen budgets, *Proc. Natl. Acad. Sci. U.S.A.*, 113(6), 1516–1521, doi:10.1073/pnas.1508108113,  
16 2016.
- 17 Lin, Y.-H., Zhang, H., Pye, H. O., Zhang, Z., Marth, W. J., Park, S., Arashiro, M., Cui, T.,  
18 Budisulistiorini, S. H. and Sexton, K. G.: Epoxide as a precursor to secondary organic aerosol formation  
19 from isoprene photooxidation in the presence of nitrogen oxides, *Proc. Natl. Acad. Sci. U.S.A.*, 110(17),  
20 6718–6723, doi:10.1073/pnas.1221150110/-/DCSupplemental, 2013.
- 21 Liu, Y. J.; Herdinger-Blatt, I.; McKinney, K. A.; Martin, S. T., Production of methyl vinyl ketone and  
22 methacrolein via the hydroperoxyl pathway of isoprene oxidation, *Atmos. Chem. Phys.*, 13 (11), 5715–  
23 5730, 2013.
- 24 Lockwood, A. L., Shepson, P. B., Fiddler, M. N. and Alaghmand, M.: Isoprene nitrates: preparation,  
25 separation, identification, yields, and atmospheric chemistry, *Atmos. Chem. Phys.*, 10(13), 6169–6178,  
26 doi:10.5194/acp-10-6169-2010, 2010.
- 27 Mao, J.; Paulot, F.; Jacob, D. J.; Cohen, R. C.; Crouse, J. D.; Wennberg, P. O.; Keller, C. A.; Hudman,  
28 R. C.; Barkley, M. P.; Horowitz, L. W., Ozone and organic nitrates over the eastern United States:  
29 Sensitivity to isoprene chemistry, *J. Geophys Res.*, 118 (19), 11, 256–11, 268, 2013.
- 30 Mendenhall, W., Beaver, R. J. and Beaver, B. M.: Introduction to Probability and Statistics, 13 ed.,  
31 Cengage Learning, 2009.
- 32 Milford, J. B., Gao, D., Sillman, S., Blossy, P. and Russell, A. G.: Total reactive nitrogen (NO<sub>y</sub>) as an  
33 indicator of the sensitivity of ozone to reductions in hydrocarbon and NO<sub>x</sub> emissions, *J. Geophys. Res.*,  
34 99(D2), 3533–3542, 1994.
- 35 Nguyen, T. B., Bates, K. H., Crouse, J. D., Schwantes, R. H., Zhang, X., Kjaergaard, H. G., Surratt, J.  
36 D., Lin, P., Laskin, A., Seinfeld, J. H. and Wennberg, P. O.: Mechanism of the hydroxyl radical  
37 oxidation of methacryloyl peroxyacetyl nitrate (MPAN) and its pathway toward secondary organic aerosol  
38 formation in the atmosphere, *Phys. Chem. Chem. Phys.*, 17(27), 17914–17926,  
39 doi:10.1039/C5CP02001H, 2015.
- 40 Nguyen, T. B., Crouse, J. D., Schwantes, R. H., Teng, A. P., Bates, K. H., Zhang, X., St Clair, J. M.,  
41 Brune, W. H., Tyndall, G. S., Keutsch, F. N., Seinfeld, J. H. and Wennberg, P. O.: Overview of the  
42 Focused Isoprene eXperiment at the California Institute of Technology (FIXCIT): mechanistic chamber  
43 studies on the oxidation of biogenic compounds, *Atmos. Chem. Phys.*, 14(24), 13531–13549,  
44 doi:10.5194/acp-14-13531-2014, 2014.

- 1 Nouaime, G., Bertman, S. B., Seaver, C., Elyea, D., Huang, H., Shepson, P. B., Starn, T. K., Riemer, D.  
2 D., Zika, R. G. and Olszyna, K.: Sequential oxidation products from tropospheric isoprene chemistry:  
3 MACR and MPAN at a NO<sub>x</sub>-rich forest environment in the southeastern United States, *J. Geophys.*  
4 *Res.*, 103(D17), 22463–22471, doi:10.1029/98JD00320, 1998.
- 5 Paulot, F., Crouse, J. D., Kjaergaard, H. G., Kroll, J. H., Seinfeld, J. H. and Wennberg, P. O.: Isoprene  
6 photooxidation: new insights into the production of acids and organic nitrates, *Atmos. Chem. Phys.*,  
7 9(4), 1479–1501, 2009a.
- 8 Paulot, F.; Crouse, J. D.; Kjaergaard, H. G.; Kürten, A.; Clair, J. M. S.; John H Seinfeld; Wennberg, P.  
9 O., Unexpected Epoxide Formation in the Gas-Phase Photooxidation of Isoprene, *Science*, 325, 730,  
10 2009b.
- 11 Pippin, M., Bertman, S., Thornberry, T., Town, M., Carroll, M. A. and Sillman, S.: Seasonal variations of  
12 PAN, PPN, and O<sub>3</sub> at the upper Midwest PROPHET site, *J. Geophys. Res.*, 106(D20), 24451–24463,  
13 doi:10.1029/2001JD900222, 2001.
- 14 Pye, H. O. T., Luecken, D. J., Xu, L., Boyd, C. M., Ng, N. L., Baker, K. R., Ayres, B. R., Bash, J. O.,  
15 Baumann, K., Carter, W. P. L., Edgerton, E., Fry, J. L., Hutzell, W. T., Schwede, D. B. and Shepson, P.  
16 B.: Modeling the Current and Future Roles of Particulate Organic Nitrates in the Southeastern United  
17 States, *Environ. Sci. Technol.*, 49(24), 14195–14203, doi:10.1021/acs.est.5b03738, 2015.
- 18 Pye, H. O. T., Pinder, R. W., Piletic, I. R., Xie, Y., Capps, S. L., Lin, Y.-H., Surratt, J. D., Zhang, Z.,  
19 Gold, A., Luecken, D. J., Hutzell, W. T., Jaoui, M., Offenberg, J. H., Kleindienst, T. E., Lewandowski,  
20 M. and Edney, E. O.: Epoxide Pathways Improve Model Predictions of Isoprene Markers and Reveal  
21 Key Role of Acidity in Aerosol Formation, *Environ. Sci. Technol.*, 47(19), 11056–11064,  
22 doi:10.1021/es402106h, 2013.
- 23 Rindelaub, J. D., Borca, C. H., Hostetler, M. A., Slade, J. H., Lipton, M. A., Slipchenko, L. V., and  
24 Shepson, P. B.: The acid-catalyzed hydrolysis of an  $\alpha$ -pinene-derived organic nitrate: kinetics, products,  
25 reaction mechanisms, and atmospheric impact, *Atmos. Chem. Phys.*, 16, 15425-15432,  
26 <https://doi.org/10.5194/acp-16-15425-2016>, 2016.
- 27 Roberts, J. M., Flocke, F., Stroud, C. A., Hereid, D., Williams, E., Fehsenfeld, F., Brune, W., Martinez,  
28 M., Harder, H., Ground-based measurements of peroxy-carboxylic nitric anhydrides (PANs) during the  
29 1999 Southern Oxidants Study Nashville Intensive, *J. Geophys. Res.*, 107(D21), 4554,  
30 doi:10.1029/2001JD000947, 2002.
- 31 Roberts, J. M. and Bertman, S. B.: The thermal decomposition of peroxyacetic nitric anhydride (PAN)  
32 and peroxy-methacrylic nitric anhydride (MPAN), *Int. J. Chem. Kinet.*, 24(3), 297–307, 1992.
- 33 Roberts, J. M., Flocke, F., Weinheimer, A., Tanimoto, H., Jobson, B. T., Riemer, D., Apel, E., Atlas, E.,  
34 Donnelly, S. and Stroud, V.: Observations of APAN during TexAQS 2000, *Geophys. Res. Lett.*, 28(22),  
35 4195–4198, 2001.
- 36 Roberts, J. M., Williams, J., Baumann, K., Buhr, M. P., Goldan, P. D., Holloway, J., Hübler, G., Kuster,  
37 W. C., McKeen, S. A. and Ryerson, T. B.: Measurements of PAN, PPN, and MPAN made during the  
38 1994 and 1995 Nashville Intensives of the Southern Oxidant Study: Implications for regional ozone  
39 production from biogenic hydrocarbons, *J. Geophys. Res.*, 103(D17), 22473–22490, 1998.
- 40 Rollins, A. W., Smith, J. D., Wilson, K. R. and Cohen, R. C.: Real Time In Situ Detection of Organic  
41 Nitrates in Atmospheric Aerosols, *Environ. Sci. Technol.*, 44(14), 5540–5545, doi:10.1021/es100926x,  
42 2010.
- 43 Romer, P. S., Duffey, K. C., Wooldridge, P. J., Allen, H. M., Ayres, B. R., Brown, S. S., Brune, W. H.,  
44 Crouse, J. D., de Gouw, J., Draper, D. C., Feiner, P. A., Fry, J. L., Goldstein, A. H., Koss, A., Misztal,

- 1 P. K., Nguyen, T. B., Olson, K., Teng, A. P., Wennberg, P. O., Wild, R. J., Zhang, L. and Cohen, R. C.:  
2 The lifetime of nitrogen oxides in an isoprene-dominated forest, *Atmos. Chem. Phys.*, 16(12), 7623–  
3 7637, doi:10.5194/acp-16-7623-2016, 2016.
- 4 Russell, A. R., Valin, L. C. and Cohen, R. C.: Trends in OMI NO<sub>2</sub> observations over the United States:  
5 effects of emission control technology and the economic recession, *Atmos. Chem. Phys.*, 12(24),  
6 12197–12209, doi:10.5194/acp-12-12197-2012, 2012.
- 7 Shepson, P. B.: Organic Nitrates, in *Volatile Organic Compounds in the Atmosphere*, Ch. 7, edited by R.  
8 Koppmann, pp. 269–291, Blackwell Publishing Ltd, Oxford, UK. 2007.
- 9 Starn, T. K., Shepson, P. B., Bertman, S. B., White, J. S., Splawn, B. G., Riemer, D. D., Zika, R. G. and  
10 Olszyna, K.: Observations of isoprene chemistry and its role in ozone production at a semirural site  
11 during the 1995 Southern Oxidants Study, *J. Geophys. Res.*, 103(D17), 22425–22435,  
12 doi:10.1029/98JD01279, 1998.
- 13 Surratt, J. D., Chan, A. W. H., Eddingsaas, N. C., Chan, M., Loza, C. L., Kwan, A. J., Hersey, S. P.,  
14 Flagan, R. C., Wennberg, P. O. and Seinfeld, J. H.: Atmospheric Chemistry Special Feature: Reactive  
15 intermediates revealed in secondary organic aerosol formation from isoprene, *Proc. Natl. Acad. Sci.*  
16 U.S.A., 107(15), 6640–6645, doi:10.1073/pnas.0911114107, 2010.
- 17 Tanimoto, H. and Akimoto, H.: A new peroxy-carboxylic nitric anhydride identified in the atmosphere:  
18 CH<sub>2</sub>=CHC(O)OONO<sub>2</sub> (APAN), *Geophys. Res. Lett.*, 28(14), 2831–2834, 2001.
- 19 Tatsuoka, M. M.: *Multivariate Analysis: Techniques for Educational and Psychological Research*, John  
20 Wiley & Sons. 1971.
- 21 Thornton, J. A., Wooldridge, P. J., Cohen, R. C., Martinez, M., Harder, H., Brune, W. H., Williams, E. J.,  
22 Roberts, J. M., Fehsenfeld, F. C., Hall, S. R., Shetter, R. E., Wert, B. P. and Fried, A.: Ozone production  
23 rates as a function of NO<sub>x</sub> abundances and HO<sub>x</sub> production rates in the Nashville urban plume, *J.*  
24 *Geophys. Res.*, 107(D12), F124–17, doi:10.1029/2001JD000932, 2002.
- 25 Trainer, M., Parrish, D. D., Buhr, M. P., Norton, R. B., Fehsenfeld, F. C., Anlauf, K. G., Bottenheim, J.  
26 W., Tang, Y. Z., Wiebe, H. A., Roberts, J. M., Tanner, R. L., Newman, L., Bowersox, V. C., Meagher,  
27 J. F., Olszyna, K. J., Rodgers, M. O., Wang, T., Berresheim, H., Demerjian, K. L. and Roychowdhury,  
28 U. K.: Correlation of ozone with NO<sub>y</sub> in photochemically aged air, *J. Geophys. Res.*, 98(D2), 2917–  
29 2925, doi:10.1029/92JD01910, 1993.
- 30 USEPA, <https://www.epa.gov/air-trends/>.
- 31 Washenfelder, R. A., Attwood, A. R., Brock, C. A., Guo, H., Xu, L., Weber, R. J., Ng, N. L., Allen, H.  
32 M., Ayres, B. R., Baumann, K., Cohen, R. C., Draper, D. C., Duffey, K. C., Edgerton, E., Fry, J. L., Hu,  
33 W. W., Jimenez, J. L., Palm, B. B., Romer, P., Stone, E. A., Wooldridge, P. J. and Brown, S. S.:  
34 Biomass burning dominates brown carbon absorption in the rural southeastern United States, *Geophys.*  
35 *Res. Lett.*, 42, 653–664, doi:10.1002/2014GL062444, 2015.
- 36 Wennberg, P. O., Bates, K. H., Crouse, J. D., Dodson, L. G., McVay, R. C., Mertens, L. A., Nguyen, T.  
37 B., Praske, E., Schwantes, R. H., Smarte, M. D., St Clair, J. M., Teng, A. P., Zhang, X. and Seinfeld, J.  
38 H.: Gas-Phase Reactions of Isoprene and Its Major Oxidation Products, *Chem. Rev.*,  
39 *acs.chemrev.7b00439–54*, doi:10.1021/acs.chemrev.7b00439, 2018.
- 40 Williams, J., Roberts, J. M., Fehsenfeld, F. C., Bertman, S. B., Buhr, M. P., Goldan, P. D., Hübler, G.,  
41 Kuster, W. C., Ryerson, T. B., Trainer, M. and Young, V.: Regional ozone from biogenic hydrocarbons  
42 deduced from airborne measurements of PAN, PPN, and MPAN, *Geophys. Res. Lett.*, 24(9), 1099–  
43 1102, doi:10.1029/97GL00548, 1997.

- 1 Worton, D. R., Surratt, J. D., LaFranchi, B. W., Chan, A. W. H., Zhao, Y., Weber, R. J., Park, J.-H.,  
2 Gilman, J. B., de Gouw, J., Park, C., Schade, G., Beaver, M., Clair, J. M. S., Crounse, J., Wennberg, P.,  
3 Wolfe, G. M., Harrold, S., Thornton, J. A., Farmer, D. K., Docherty, K. S., Cubison, M. J., Jimenez, J.  
4 L., Frossard, A. A., Russell, L. M., Kristensen, K., Glasius, M., Mao, J., Ren, X., Brune, W., Browne, E.  
5 C., Pusede, S. E., Cohen, R. C., Seinfeld, J. H. and Goldstein, A. H.: Observational Insights into  
6 Aerosol Formation from Isoprene, *Environ. Sci. Technol.*, 47(20), 11403–11413,  
7 doi:10.1021/es4011064, 2013.
- 8 Xiong, F., McAvey, K. M., Pratt, K. A., Groff, C. J., Hostetler, M. A., Lipton, M. A., Starn, T. K., Seeley,  
9 J. V., Bertman, S. B., Teng, A. P., Crounse, J. D., Nguyen, T. B., Wennberg, P. O., Misztal, P. K.,  
10 Goldstein, A. H., Guenther, A. B., Koss, A. R., Olson, K. F., de Gouw, J. A., Baumann, K., Edgerton, E.  
11 S., Feiner, P. A., Zhang, L., Miller, D. O., Brune, W. H., and Shepson, P. B.: Observation of isoprene  
12 hydroxynitrates in the southeastern United States and implications for the fate of NO<sub>x</sub>, *Atmos. Chem.*  
13 *Phys.*, 15, 11257-11272, <https://doi.org/10.5194/acp-15-11257-2015>, 2015.
- 14 Xu, L., Guo, H., Boyd, C. M., Klein, M., Bougiatioti, A., Cerully, K. M., Hite, J. R., Isaacman-VanWertz,  
15 G., Kreisberg, N. M., Knote, C., Olson, K., Koss, A., Goldstein, A. H., Hering, S. V., de Gouw, J.,  
16 Baumann, K., Lee, S.-H., Nenes, A., Weber, R. J. and Ng, N. L.: Effects of anthropogenic emissions on  
17 aerosol formation from isoprene and monoterpenes in the southeastern United States, *Proc. Natl. Acad.*  
18 *Sci. U.S.A.*, 112(1), 37–42, doi:10.1073/pnas.1417609112, 2015.
- 19

1

**Table 1. Summary of selective Southern Oxidants Study (SOS) since 1990.** Mean±standard deviation.

| Year                                | 1990                 | 1990                 | 1992                | 1994                         | 1995                 | 1999                 | 1999                               | 2013 <sup>2</sup>   |
|-------------------------------------|----------------------|----------------------|---------------------|------------------------------|----------------------|----------------------|------------------------------------|---------------------|
|                                     | Elberton,<br>GA      | ROSE,<br>AL          | ROSE,<br>AL         | New<br>Hendersonville,<br>TN | Youth<br>Inc., TN    | Dickson,<br>TN       | Cornelia<br>Fort<br>Airpark,<br>TN | Centreville<br>, AL |
|                                     | Ground               | Ground               | Ground              | 9m<br>AGL <sup>*1</sup>      | Ground               | Ground               | 10m AGL                            | 7.5m AGL            |
|                                     | June 24 -<br>July 13 | June 10 -<br>July 20 | June 19 -<br>July 2 | June 22 -<br>July 19         | June 29 -<br>July 25 | June 15 -<br>July 14 | June 14 -<br>July 14               | June 1 -<br>July 15 |
| <hr/>                               |                      |                      |                     |                              |                      |                      |                                    |                     |
| PAN (ppt)                           |                      |                      |                     |                              |                      |                      |                                    |                     |
| Daytime                             | 258±157              | 519±455              | 259±177             | 764±662                      | 765±400              | 583±360              | 1078±519                           | 169±129             |
| All day                             | 203±138              | 376±346              | 195±159             | 473±439                      | 485±366              | 431±316              | 694±487                            | 126±110             |
| PPN (ppt)                           |                      |                      |                     |                              |                      |                      |                                    |                     |
| Daytime                             | n/a                  | 25±24                | n/a                 | 92±106                       | 72±47                | 39±45                | 141±83                             | 5±7                 |
| All day                             |                      | 19±18                |                     | 54±66                        | 50±39                | 33±40                | 93±72                              | 4±5                 |
| MPAN (ppt)                          |                      |                      |                     |                              |                      |                      |                                    |                     |
| Daytime                             | n/a                  | n/a                  | n/a                 | 50±41                        | 38±25                | 31±26                | 91±48                              | 9±10                |
| All day                             |                      |                      |                     | 37±32                        | 30±21                | 20±21                | 64±45                              | 5±7                 |
| PPN/PAN                             |                      |                      |                     |                              |                      |                      |                                    |                     |
| Daytime                             | n/a                  | 0.068±0.1<br>34      | n/a                 | 0.118±0.0<br>39              | 0.092±0.0<br>28      | 0.054±0.0<br>41      | 0.127±0.0<br>36                    | 0.033±0.03<br>2     |
| All day                             |                      | 0.059±0.0<br>78      |                     | 0.112±0.0<br>42              | 0.094±0.0<br>34      | 0.061±0.0<br>49      | 0.128±0.0<br>48                    | 0.042±0.04<br>4     |
| MPAN/PAN                            |                      |                      |                     |                              |                      |                      |                                    |                     |
| Daytime                             | n/a                  | n/a                  | n/a                 | 0.073±0.0<br>34              | 0.055±0.0<br>31      | 0.061±0.0<br>45      | 0.105±0.0<br>70                    | 0.049±0.03<br>5     |
| All day                             |                      |                      |                     | 0.089±0.0<br>47              | 0.064±0.0<br>36      | 0.049±0.0<br>40      | 0.108±0.0<br>65                    | 0.046±0.03<br>8     |
| PANs <sup>*3</sup> /NO <sub>y</sub> |                      |                      |                     |                              |                      |                      |                                    |                     |
| Daytime                             | 0.125±0.0<br>53      | 0.255±0.1<br>28      | 0.060±0.0<br>28     | 0.171±0.1<br>32              | 0.140±0.0<br>47      | 0.136±0.0<br>46      | 0.132±0.0<br>62                    | 0.155±0.08<br>1     |
| All day                             | 0.091±0.0<br>51      | 0.172±0.1<br>13      | 0.042±0.0<br>29     | 0.080±0.0<br>90              | 0.101±0.0<br>58      | 0.101±0.0<br>52      | 0.064±0.0<br>61                    | 0.110±0.06<br>7     |
| O <sub>3</sub> (ppb)                |                      |                      |                     |                              |                      |                      |                                    |                     |
| Daytime                             | 56±10                | 52±14                | 63±6.2              | 51±21                        | 70±23                | 54±19                | 60±23                              | 34±11               |
| All day                             | 39±19                | 36±18                | 51±15               | 31±21                        | 51±27                | 44±20                | 37±27                              | 26±13               |
| NO <sub>y</sub> (ppb)               |                      |                      |                     |                              |                      |                      |                                    |                     |
| Daytime                             | 2.1±0.6              | 2.2±1.1              | 3.1±0.9             | 7.3±4.5                      | 7.2±4.9              | 5.4±5.6              | 10.2±5.3                           | 1.1±0.4             |
| All day                             | 2.4±0.8              | 2.6±1.9              | 3.5±2.0             | 11.1±8.8                     | 8.0±5.5              | 5.1±3.9              | 18.6±15.5                          | 1.2±0.8             |
| NO <sub>x</sub> (ppb)               |                      |                      |                     |                              |                      |                      |                                    |                     |
| Daytime                             | 0.8±0.3              | 0.87±0.71            | 0.67±0.29           | 5.2±4.4                      | 2.0±2.3              | 2.6±5.5              | 5.35±4.6                           | 0.34±0.22           |
| All day                             | 1.1±0.7              | 1.8±2.0              | 1.7±1.9             | 10.6±9.5                     | 3.8±3.9              | 2.9±3.9              | 16.5±17.6                          | 0.63±0.60           |
| Isoprene (ppb)                      |                      |                      |                     |                              |                      |                      |                                    |                     |
| Daytime                             | 6.2±3.2              | 5.4±2.4              | 2.9±1.2             |                              | 1.3±0.8              | 2.0±1.2              | 0.5±0.3                            | 5.2±1.9             |
| All day                             | 4.7±4.1              | 3.9±3.2              | 2.2±2.0             |                              | 1.0±1.0              | 1.7±1.8              | 0.5±0.8                            | 3.4±2.4             |
| Temperature (°C)                    |                      |                      |                     |                              |                      |                      |                                    |                     |
| Daytime                             |                      | 30.9±2.6             | 31±3.3              | 28.4±2.7                     | 29.2±2.7             | 25.9±2.8             |                                    | 27.5±2.5            |

|         |          |          |          |          |          |             |
|---------|----------|----------|----------|----------|----------|-------------|
| All day | 27.8±4.3 | 28.6±4.5 | 25.3±3.3 | 25.7±3.9 | 23.1±3.8 | 24.7±3.2    |
|         | *4,*5,*6 | *5       | *7,*8    | *9,*10   | *11      | *11,*12,*13 |

1

2 \*<sup>1</sup>AGL means above ground level. Daytime is 10 am – 4pm local time.

3 \*<sup>2</sup>The data on June 4th was not included. PPN and MPAN include data of below detection limit, 1.8 and  
4 1.9 pptv respectively.

5 \*<sup>3</sup> PANs were calculated as the sum of PAN, PPN, and MPAN.

6 The data was recalculated based on time and day. References: \*<sup>4</sup>Frost et al. (1998); \*<sup>5</sup>Buhr et al.

7 (1995); \*<sup>6</sup>Cantrell et al. (1992); \*<sup>7</sup>Robert et al. (1998); \*<sup>8</sup>Baumann et al. (2000); \*<sup>9</sup>Starn et al.

8 (1998); \*<sup>10</sup>Nouaime et al. (1998); \*<sup>11</sup>Barket et al. (2004); \*<sup>12</sup>Roberts et al. (2002); and \*<sup>13</sup>Thornton et al.  
9 (2002)

10



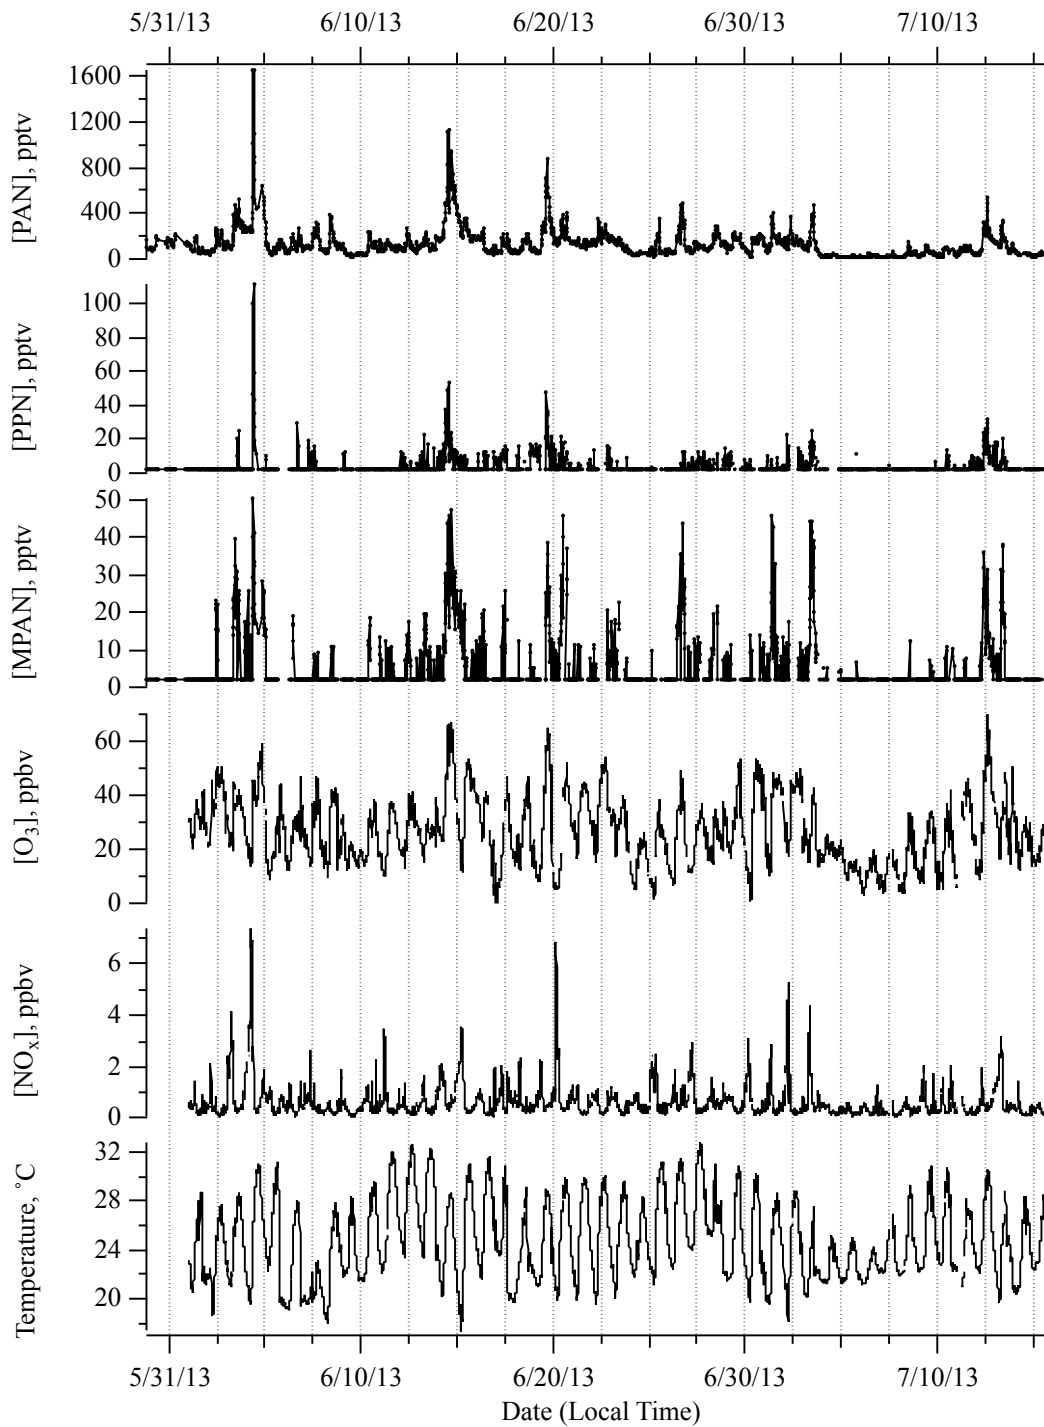

1  
 2 Figure 1. Time series of PAN, PPN, MPAN , O<sub>3</sub> and NO<sub>x</sub>, and temperature during SOAS 2013  
 3 campaign. Data that were below detection limit (BDL) are included at half of the detection limit.  
 4

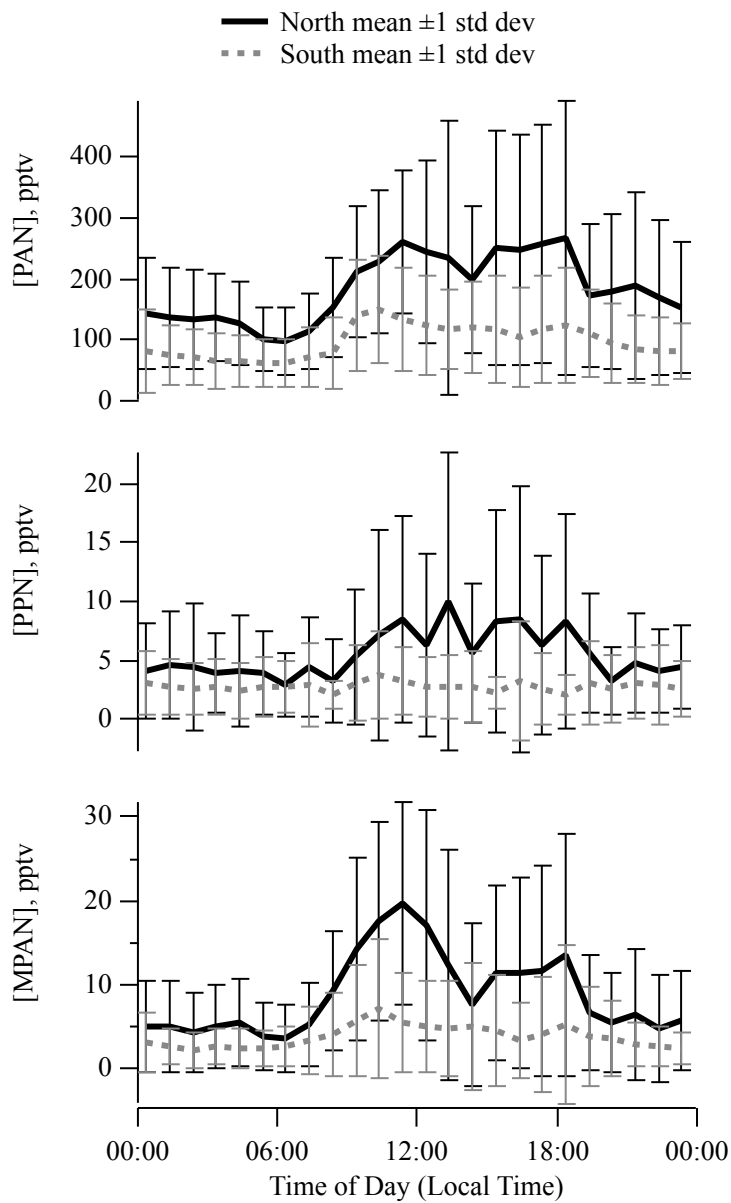

1  
 2 Figure 2. Diurnal behavior of PAN, PPN, and MPAN during SOAS 2013 with wind from South and  
 3 North.

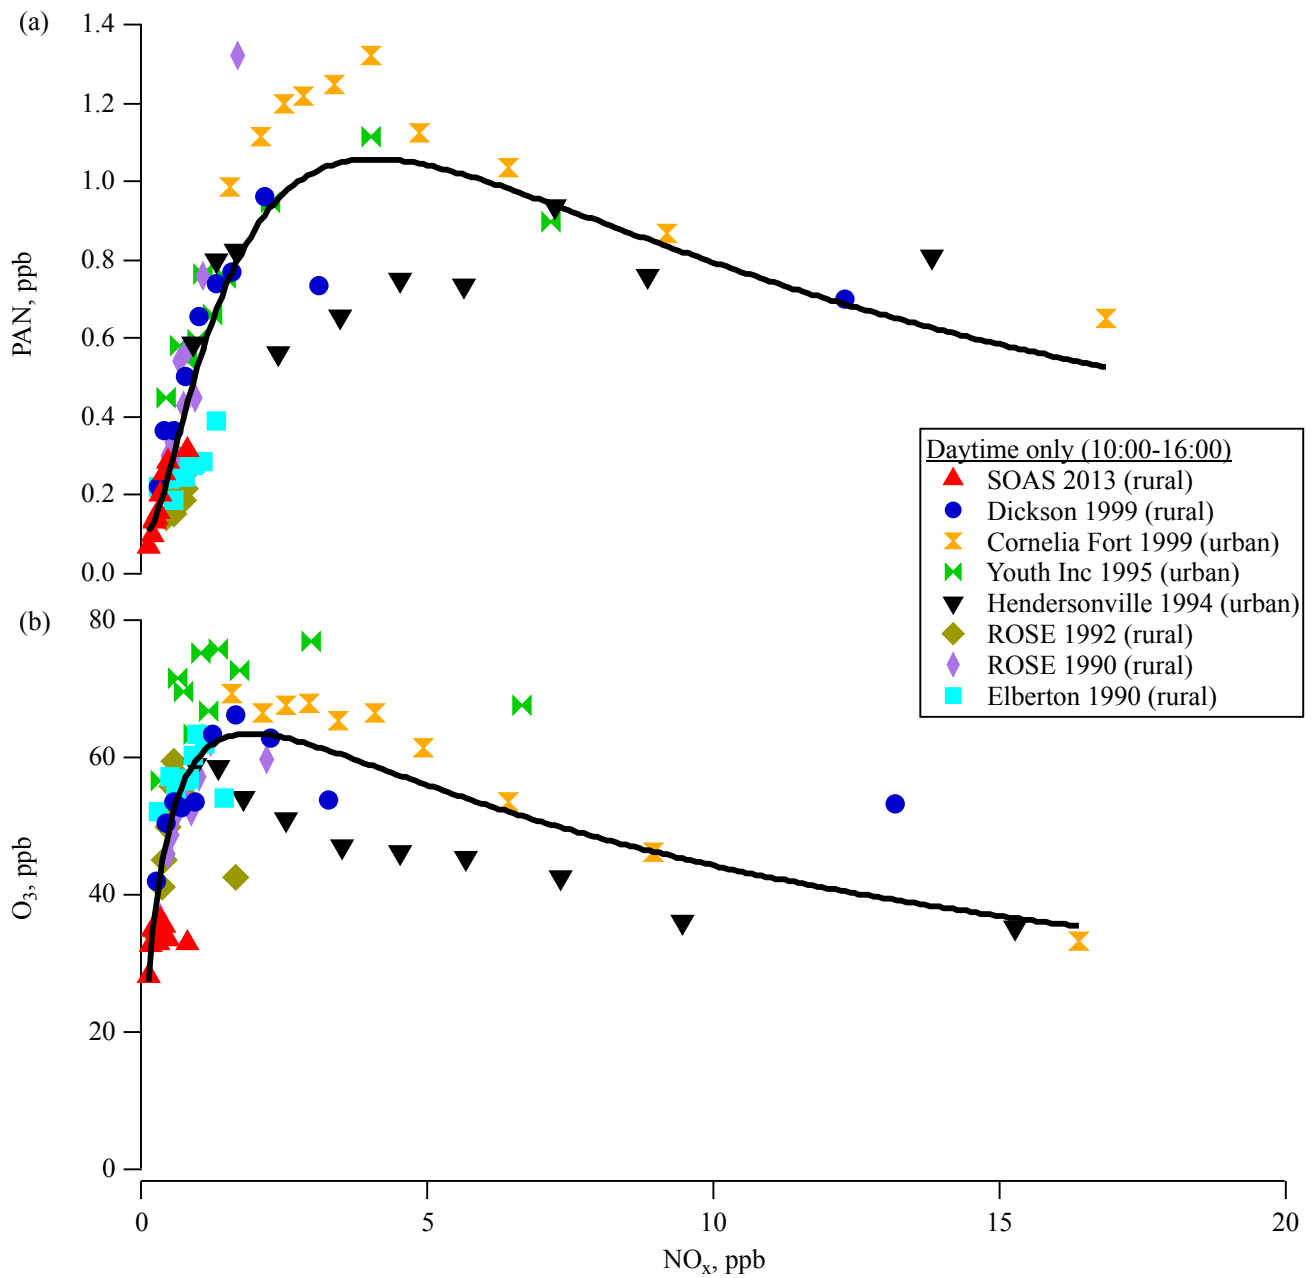

1  
2  
3  
4  
5  
6

Figure 3. Surface (a) PAN and (b) ozone concentrations for each ground site in the Southeastern U.S. over the last 23 years for 10 am – 4 pm as a function of the Concentration of  $NO_x$  in deciles. The solid line indicates a fit line for all measurements.

1

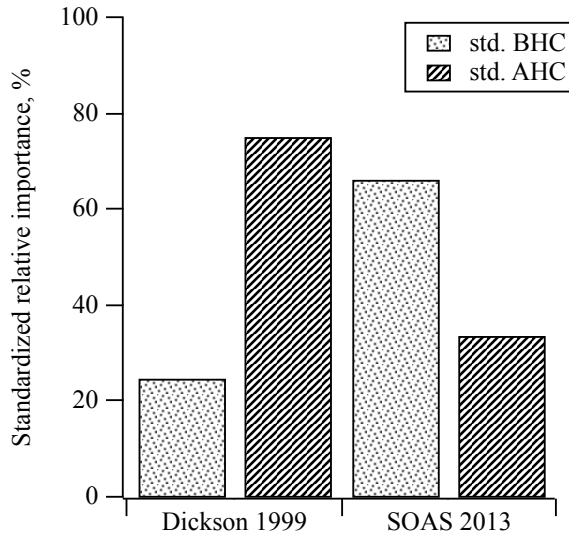

2

3 Figure 4. Comparison of standardized relative contribution to PAN formation from biogenic and  
4 anthropogenic hydrocarbons during the daytime in Dickson, TN in 1999 and SOAS, in Centreville, AL  
5 in 2013. The std. BHC and std. AHC mean that standardized relative importance of biogenic  
6 hydrocarbon and anthropogenic hydrocarbon respectively.

7

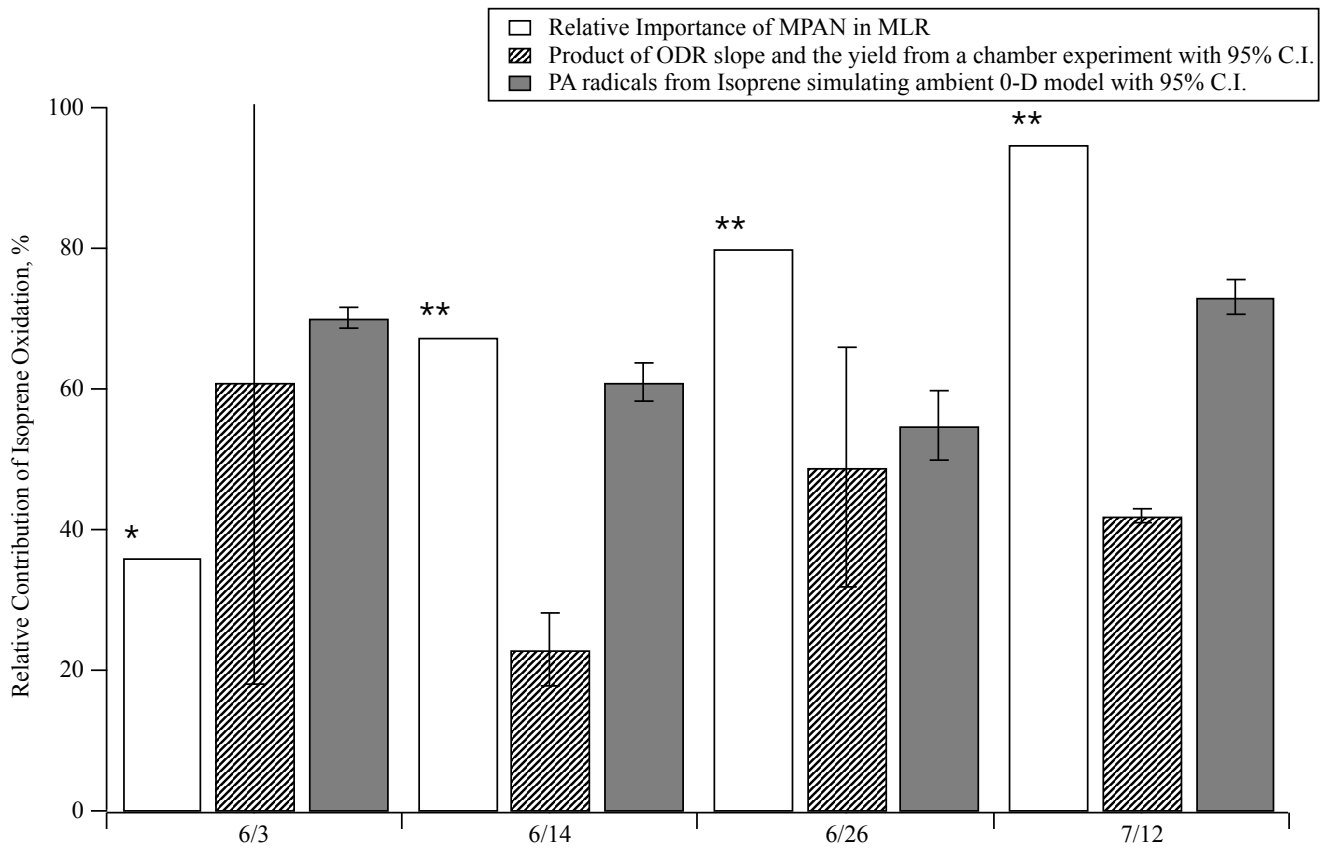

\* $P < 0.05$ , \*\* $P < 0.001$

1  
 2 Figure 5. Estimates of the relative contribution of isoprene oxidation to PANs formation during 4  
 3 specific days of SOAS 2013 using three different approaches: multiple regression analysis, ODR with  
 4 chamber data, and simulation of PA radicals using a 0-D model.  $P$  indicates the calculated probability of  
 5 the t-test; C.I. = confidence interval.  
 6

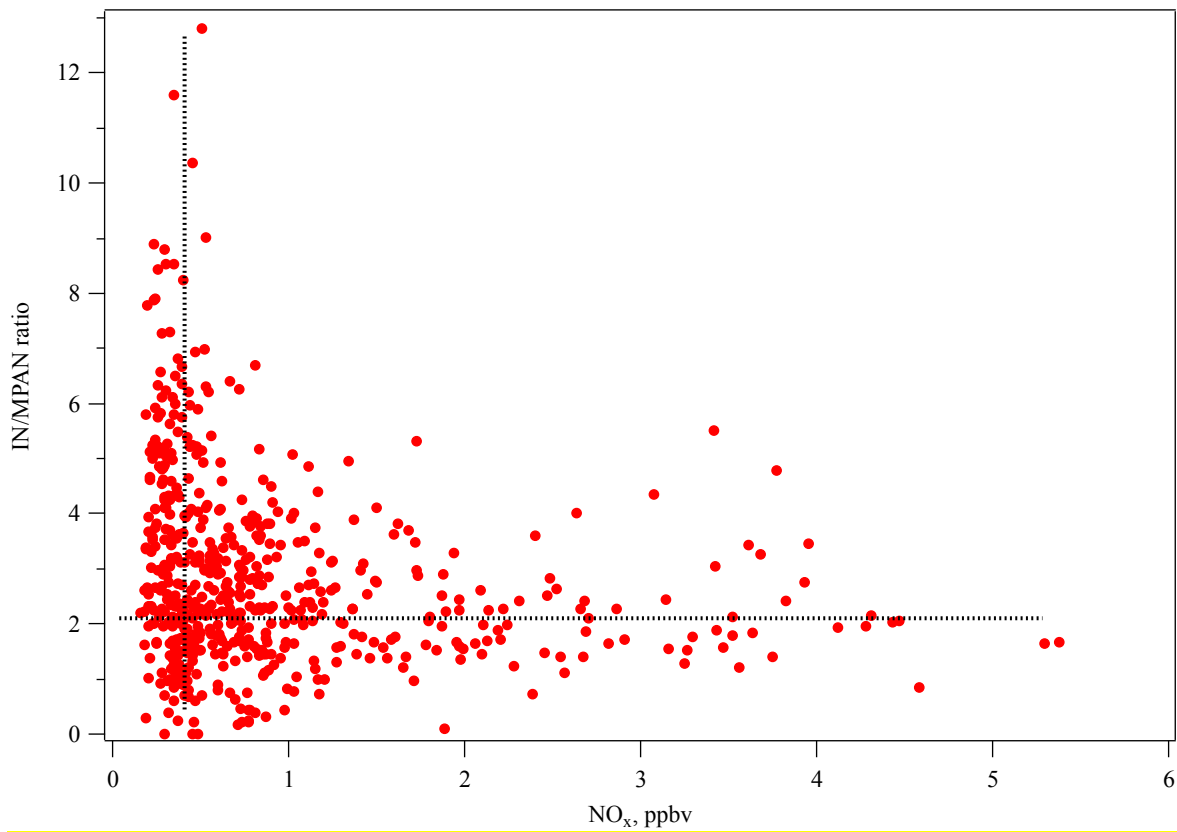

1  
2 Figure 6. The relationship of daytime IN/MPAN ratio with NO<sub>x</sub> concentration (10 am – 4pm). (The  
3 dashed vertical and horizontal lines are used for reference only.)

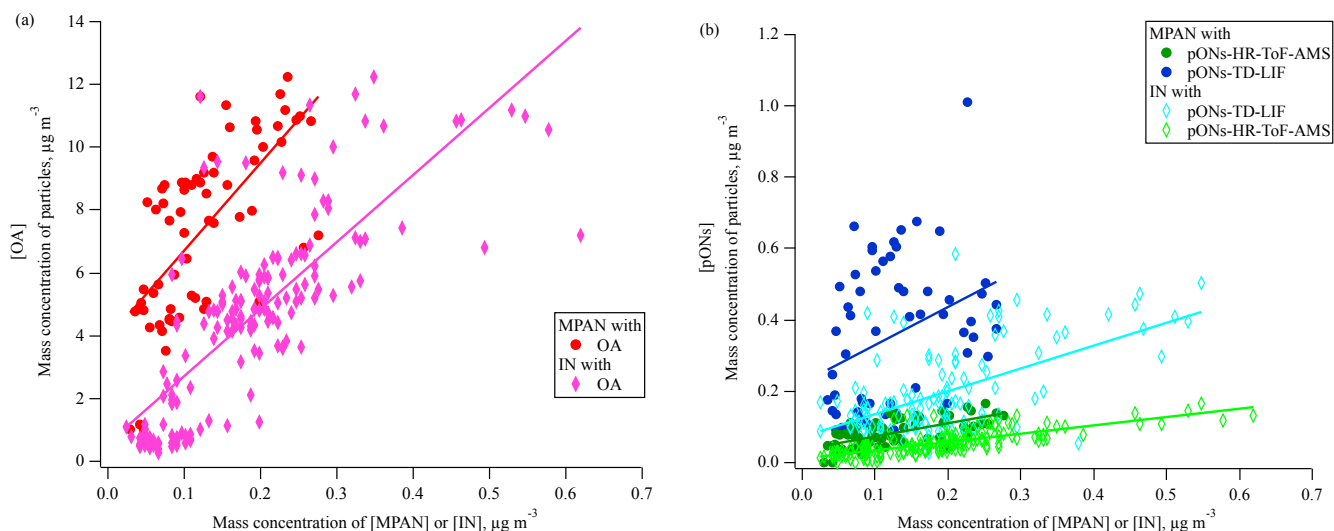

1  
 2 **Figure 7.** The relationship between mass of MPAN or IN in the gas phase and in organic aerosol during  
 3 the daytime June 29 – July 15 (the time period when data on pONs-TD-LIF was available). **(a) OA** is  
 4 organic aerosol (without organic nitrate) and **(b) pONs** is particle-phase organic nitrates. MPAN has a  
 5 linear slope ( $R^2$ ) of 27.8 (0.455) vs. OA, 0.4 (0.437) vs. pONs-HR-ToF-AMS, and 1.1 (0.120) vs. pONs-  
 6 TD-LIF. IN has a linear slope ( $R^2$ ) of 21.4 (0.606) vs. OA, 0.2 (0.603) vs. pONs-HR-ToF-AMS, and 0.6  
 7 (0.341) vs. pONs-TD-LIF.

1 Supplementary Information for

2 **“Importance of Biogenic Volatile Organic Compounds to Peroxyacyl Nitrates**  
3 **(PANs) Production in the Southeastern U.S. during SOAS 2013”**

4 **S. Toma et al.**

*Correspondence to:* S. Bertman (steven.bertman@wmich.edu)

5  
6 **Comparison of PANs measurements among WMU, ARA, and UC Berkeley**

7 During the SOAS 2013 campaign, two other research groups measured the sum of total PANs without  
8 identification of each species. ARA measured total PANs using thermal dissociation into NO<sub>2</sub> at 160 °C  
9 on top of ambient NO<sub>2</sub> located within 30 m of the WMU instrument and at the same height. The Berkeley  
10 group measured total PANs using thermal dissociation from the tower approximately 100 m north of the  
11 WMU instrument and approximately 25 m above the ground. Total PANs from all three groups showed  
12 statistically significant ( $p < 0.01$ ) positive linear correlations with each other based on results from  
13 Spearman’s rank correlation test (a nonparametric test was used due to non-normal distributions). The  
14 correlation coefficient,  $r_s$  of each pair (PAN<sub>SWMU</sub> vs. PAN<sub>SARA</sub>, PAN<sub>SWMU</sub> vs. PAN<sub>SUC</sub>, and PAN<sub>SARA</sub> vs.  
15 PAN<sub>SUC</sub>) was 0.754, 0.926, and 0.714 respectively. However, a Friedman test resulted in statistically  
16 different medians of PANs from three groups. The relationships with PAN<sub>SWMU</sub> are plotted in Figure S1.  
17 Overall, the measurement of PAN<sub>SUC</sub> was 50% greater than PAN<sub>SWMU</sub>, while the measurement of  
18 PAN<sub>SARA</sub> was 30% less than PAN<sub>SWMU</sub>. The strong statistical correlation of all datasets allows the  
19 investigation of PANs behavior despite the systematic differences.



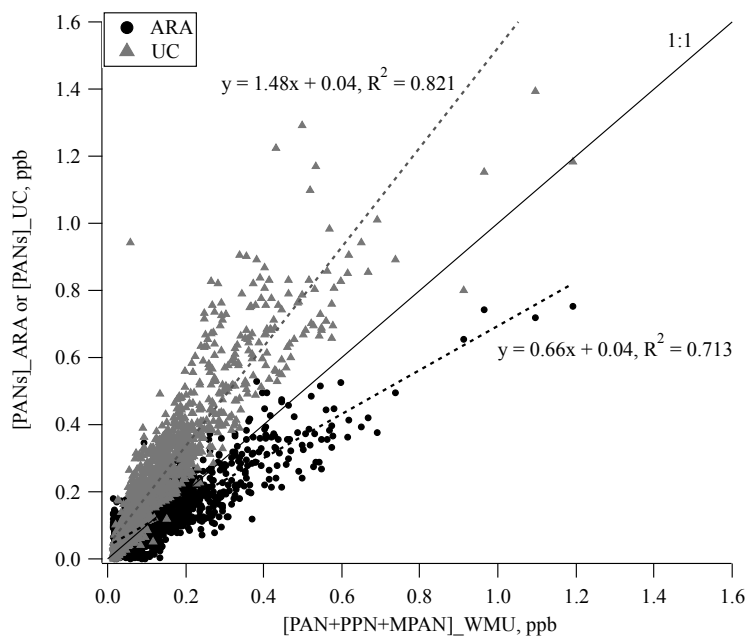

1  
 2 Figure S1. Relationship of total PANs with other research groups during SOAS 2013 campaign.  
 3 The means with standard deviation of PANs from ARA, UC, and WMU were  $0.129 \pm 0.092$ ,  
 4  $0.245 \pm 0.194$ , and  $0.138 \pm 0.119$  ppb respectively. The medians of PANs from ARA, UC, and WMU were  
 5 0.111, 0.204, and 0.103 ppb respectively.  
 6  
 7

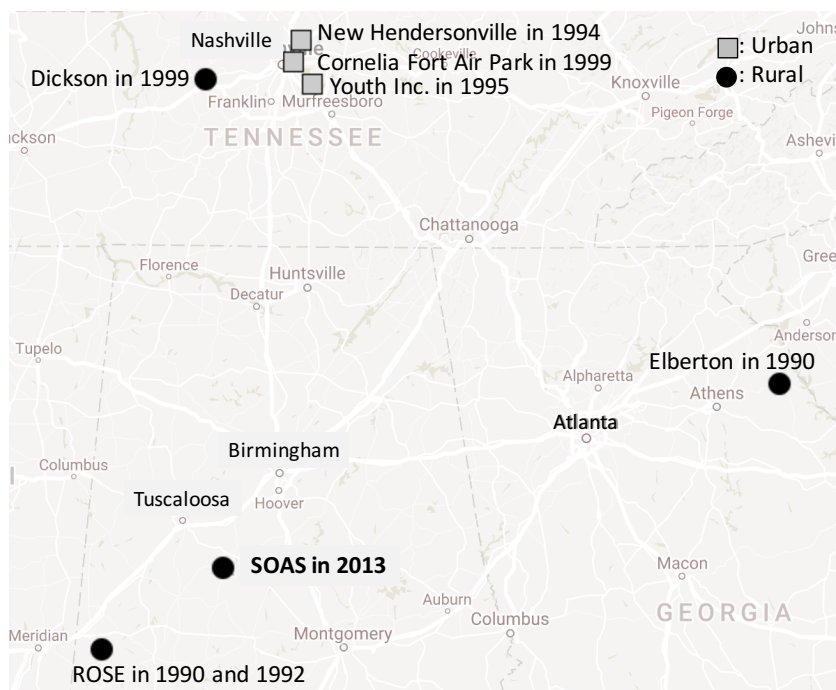

8  
 9  
 10 Figure S2. Various Locations of Other Measurements in the Southeastern U.S. since 1990. Sampling  
 11 term: Elberton (June 24<sup>th</sup> – July 13 in 1990), ROSE 1990 (June 10<sup>th</sup> – July 20<sup>th</sup> in 1990), ROSE 1992  
 12 (June 19<sup>th</sup> – July 2<sup>nd</sup> in 1992), Henderson (June 22<sup>nd</sup> – July 19<sup>th</sup> in 1994), Youth Inc. (June 29<sup>th</sup> – July  
 13 26<sup>th</sup> in 1995), Dickson (June 13<sup>th</sup> – July 15<sup>th</sup> in 1999), Cornelia Fort Ground Site (June 14<sup>th</sup> – July 14<sup>th</sup> in  
 14 1999), and SOAS 2013 (June 1<sup>st</sup> – July 15<sup>th</sup> in 2013). (Data map: Google map, 2016).

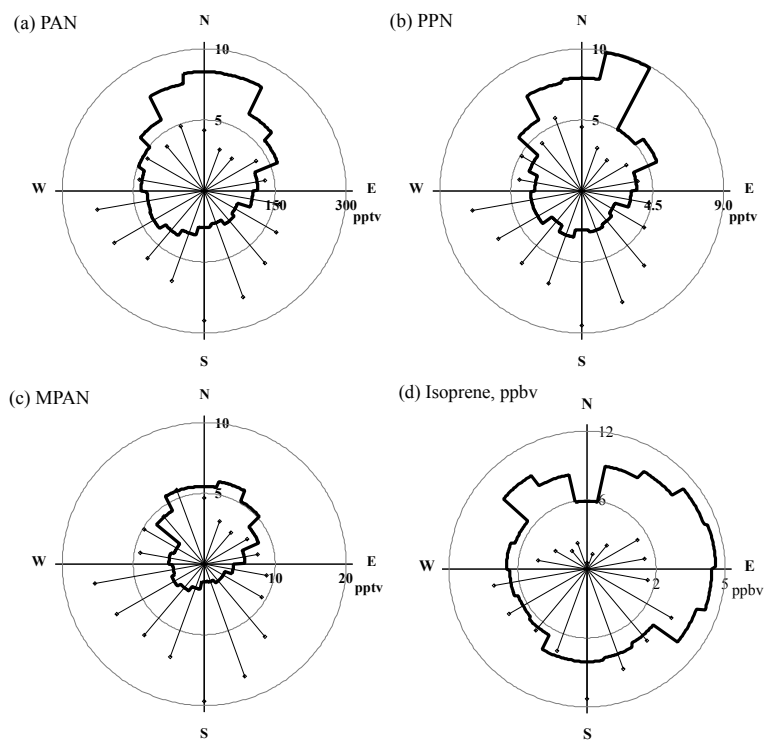

1  
2  
3  
4  
5  
6  
7

Figure S3. Polar plots of PANs and **isoprene** concentrations as a function of wind direction in SOAS 2013 (excluded June 4th). The bold trace line in each plot indicates the average concentration of each compound and the solid lines from the center are the frequency of wind direction.

1

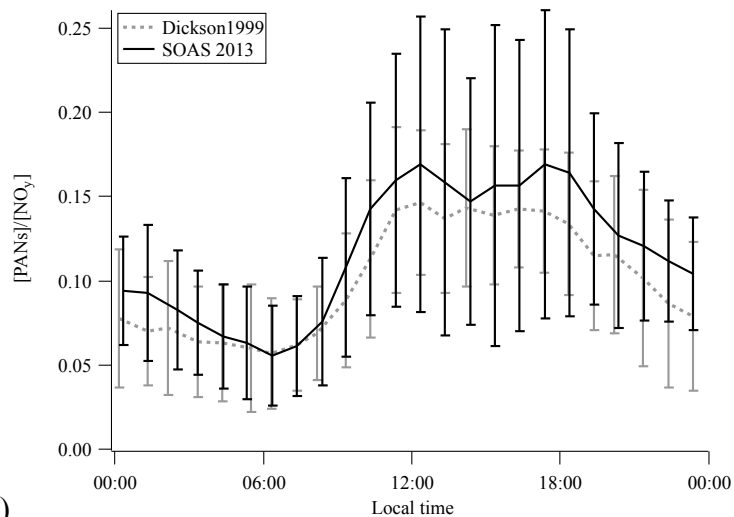

2

(a)

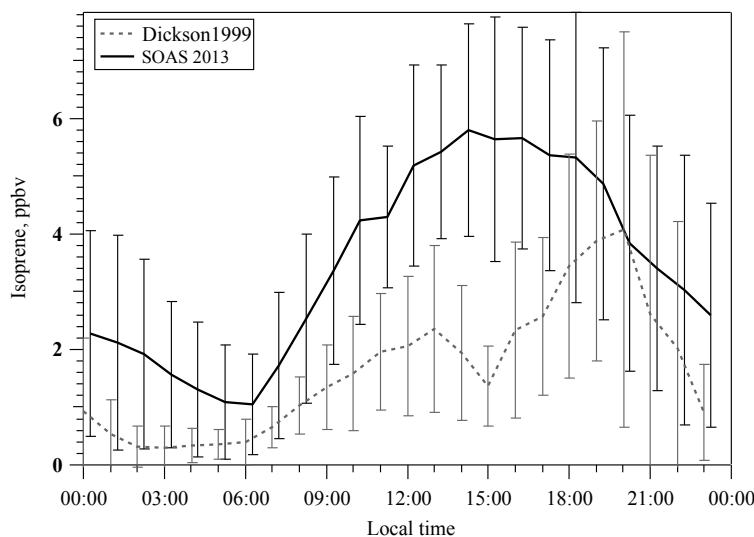

(b)

3

4

5 Figure S4. Hourly diurnal profiles of mean (a) PANs/ $\text{NO}_y$  and (b) isoprene with one standard deviation  
 6 from the Dickson 1999 and SOAS 2013 campaigns.

7

8

9

## 9 Methods and Results of MLR analysis for PANs

10

$$11 \quad [PAN] = A + B_1[MPAN] + B_2[PPN] \quad (1)$$

12

13

14

15

16

17

In a multiple linear regression (MLR) model as Equation (1), [PAN] is treated as a response variable and [MPAN] and [PPN] are used as independent predictor variables.  $B_1$  and  $B_2$  are partial regression coefficients on [MPAN] and [PPN]. The MLR statistical analysis conducted two steps of statistical testing. First, the  $F$ -test in ANOVA and  $R^2$  investigated how well the model Eq. (1) fits the measurement data. However,  $F$ -test is impossible to directly find out which predictor variable is significantly useful. Therefore, in the next step, the significant utility of each partial regression coefficient

1 was explored using the Student's  $t$ -test. The respective  $t$ -value was calculated from each partial regression  
 2 coefficient divided by the standard error. When results of the  $t$ -test indicate presence of statistical  
 3 significance for the partial regression coefficients, the magnitude of the standardized partial regression  
 4 coefficient,  $\beta_i$ , allows us to compare the relative contribution of each independent predictor variable within  
 5 the model.

6 As the notice to conduct MLR statistical analysis, high multicollinearity causes effects on the  
 7 results of the analysis (e.g. Mendenhall et al., 2009). Although the assumption of the MLR statistical  
 8 analysis on [PAN] takes a stance that each predictor variable is derived from different hydrocarbon  
 9 precursor independently, the values of “tolerance” or “variance inflation factor (VIF)” were helpful to  
 10 assess the impact of the multicollinearity. The tolerance is calculated as  $1 - R^2_{\text{MPAN-PPN}}$ , where  $R^2_{\text{MPAN-PPN}}$   
 11 is the coefficient of determination between MPAN and PPN and VIF is  $1/\text{tolerance}$ . Large VIF value  
 12 indicates strong multicollinearity of predictor variables. According to Stevens (2012), if the value of VIF  
 13 is greater than 10, it indicates effective multicollinearity.

14 The statistical analysis was conducted using SPSS statistics software (versions 16, IBM). Results  
 15 of  $F$ -test and  $R^2$  on the MLR model for SOAS 2013 during the daytime are summarized in Table S1.  
 16 Similar PANs data collected from Dickson, TN during the SOS experiment in 1999 is used as a  
 17 comparable reference. The small  $p$ -value ( $P$  in Table S1) of  $F$ -test indicated that the overall fit of the  
 18 model Eq. (1) is statistically significant in both the SOAS 2013 and Dickson 1999, and at least one  
 19 independent predictor variable was significantly useful.

20 Table S1. Summary of the  $F$ -test and  $R^2$ .

| Year                | Number of data | $P$ of $F$ -test | $R$   | $R^2$ |
|---------------------|----------------|------------------|-------|-------|
| Dickson, TN in 1999 | 486            | <0.001           | 0.876 | 0.766 |
| SOAS 2013           | 498            | <0.001           | 0.775 | 0.601 |

21  
 22 A summary of coefficients of MPAN and PPN in both SOAS 2013 and Dickson 1999 is shown in  
 23 Table S2. Since all VIF values were less than 10, there was no impact of multicollinearity in the MLR  
 24 statistical analysis in both SOAS 2013 and Dickson 1999. The small  $p$ -value ( $P$  in Table S2) of the  $t$ -test  
 25 of both MPAN and PPN in SOAS 2013 and Dickson 1999 indicates both predictor variables were useful  
 26 to predict PAN. Therefore, respective partial regression coefficient values were available to estimate PAN  
 27 in SOAS 2013 and Dickson 1999.

28

1

Table S2. Summary of coefficients on each independent predictor variable in  $t$ -test.

|                                | Dickson, TN in 1999 |             | SOAS 2013   |             |
|--------------------------------|---------------------|-------------|-------------|-------------|
|                                | MPAN                | PPN         | MPAN        | PPN         |
| Partial regression coefficient | $B_1$ 5.098         | $B_2$ 5.762 | $B_1$ 7.596 | $B_2$ 6.910 |
| Std. error of coefficient      | 0.305               | 0.178       | 0.469       | 0.725       |
| $P$ of $t$ -test               | <0.001              | <0.001      | <0.001      | <0.001      |
| VIF                            | 1.036               | 1.036       | 1.427       | 1.427       |
| $\beta_i$                      | 0.374               | 0.725       | 0.549       | 0.323       |
| $r_i$                          | 0.509               | 0.795       | 0.726       | 0.624       |
| Partial $R^2 = \beta_i r_i$    | 0.190               | 0.576       | 0.399       | 0.202       |

Std. error of coefficient means standard error of partial regression coefficient.  $P$  is calculated probability.  $\beta_i$  is standardized partial regression coefficient.  $r_i$  is zero-order correlation. All dataset was during the daytime, 10 am – 4 pm.

2  
3  
4  
5  
6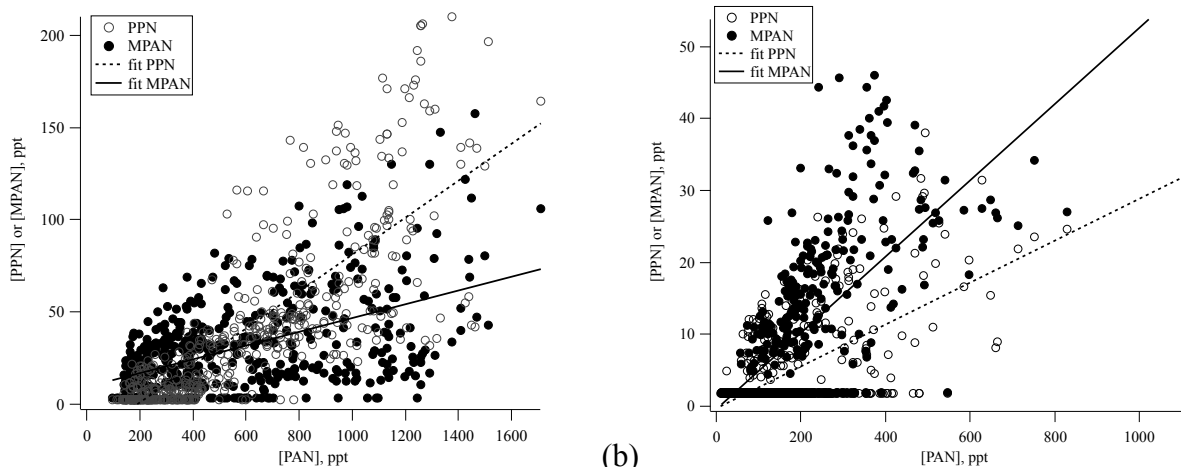7  
8  
9  
10  
11  
12  
13  
14  
15  
16

Figure S5. Scatter plots for PPN vs. PAN and MPAN vs. PAN in (a) Dickson 1999 and (b) SOAS 2013 during the daytime, 10 am – 4pm. The below detection limit data were included at half of the detection limit. The solid line is the fit for MPAN to PAN and the dash line is the fit for PPN to PAN. The slopes with standard deviation were  $0.037 \pm 0.003$  ( $R^2=0.259$ ) for MPAN to PAN and  $0.100 \pm 0.003$  ( $R^2=0.633$ ) in Dickson 1999, and  $0.053 \pm 0.002$  ( $R^2=0.530$ ) for MPAN to PAN and  $0.029 \pm 0.002$  ( $R^2=0.390$ ) in SOAS 2013.

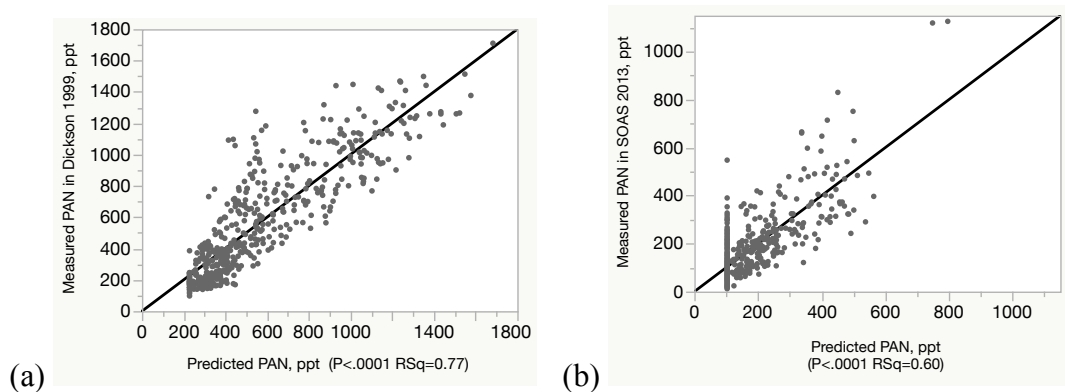

1  
2  
3  
4  
5  
6  
7  
8  
9  
10  
11

Figure 6. Measured PAN versus predicted PAN using MLR statistic (a) in Dickson 1999 and (b) in SOAS 2013 during the daytime, 10 am – 4 pm. The below detection limit data for PPN and MPAN in SOAS 2013 were included at half of the detection limit in this experiment to avoid to lose the low concentration information. (JMP version 12.1.0, SAS Institute Inc.)

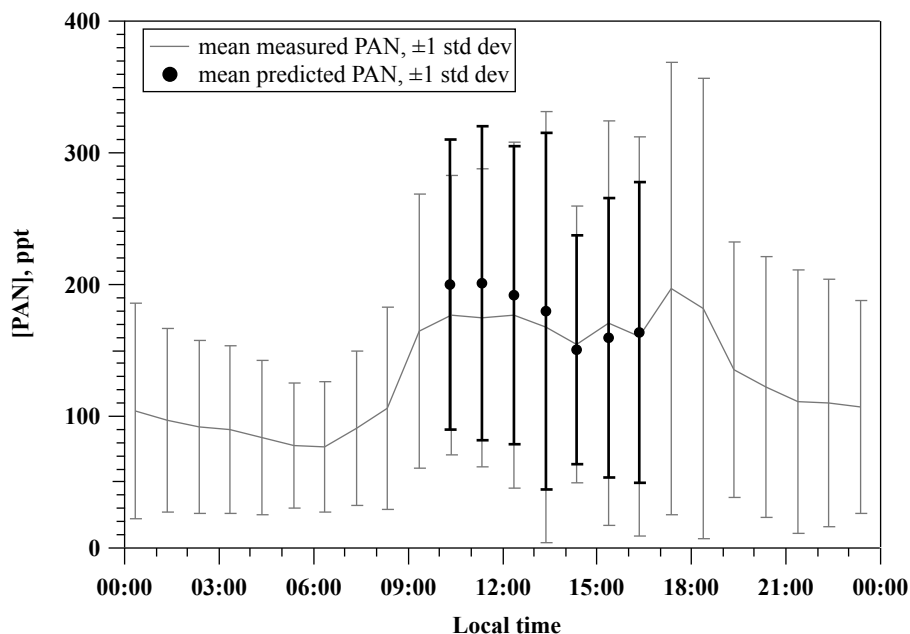

12  
13  
14  
15  
16

Figure S7. Diurnal plot of measured PAN in SOAS 2013 and predicted PAN using MLR statistic. (Note: this measured PAN was not filtered by wind direction like Figure 2.) Predicted PAN was calculated based on measured PPN and MPAN during the daytime (10 am – 4pm).
